# Supplementary material for: Design,in silicostudies, and synthesis of new 1,8-naphthyridine-3-carboxylic acid analogues and evaluation of their H1R antagonism effects
Source: Royal Society of Chemistry journal article supplement (doi:10.1039/d0ra00746c), 2020-01-01
Supplement: d0ra00746c1.pdf [file d0ra00746c1.pdf]

## **Supporting Information**

### **Designing, in silico studies, synthesis of new 1,8-Naphthyridine- 3-carboxylic acid analogues and their H1 antagonism effects evaluation**

Vinod Kumar Gurjar and Dilipkumar Pal\*,

*Department of Pharmaceutical Sciences, Guru Ghasidas Vishwavidyalaya (A Central University), Bilaspur- 495009, C.G., INDIA*

This file includes:

- **Mass and NMR Spectra of compound**

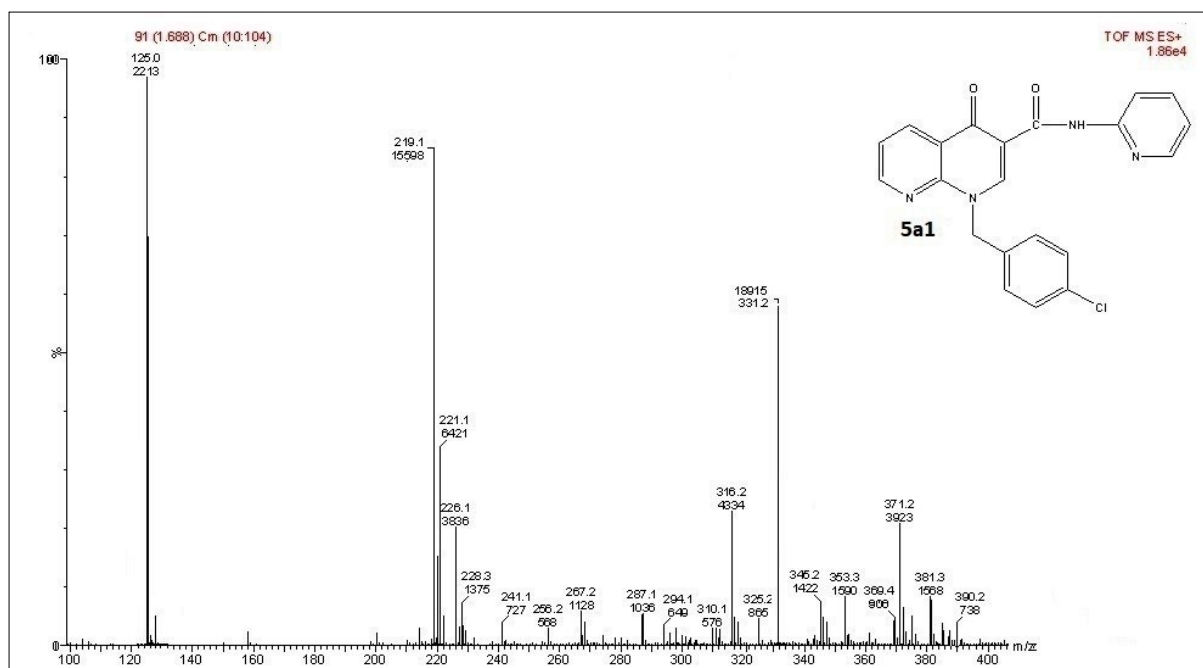

Fig:1. MASS spectra of compound 5a1

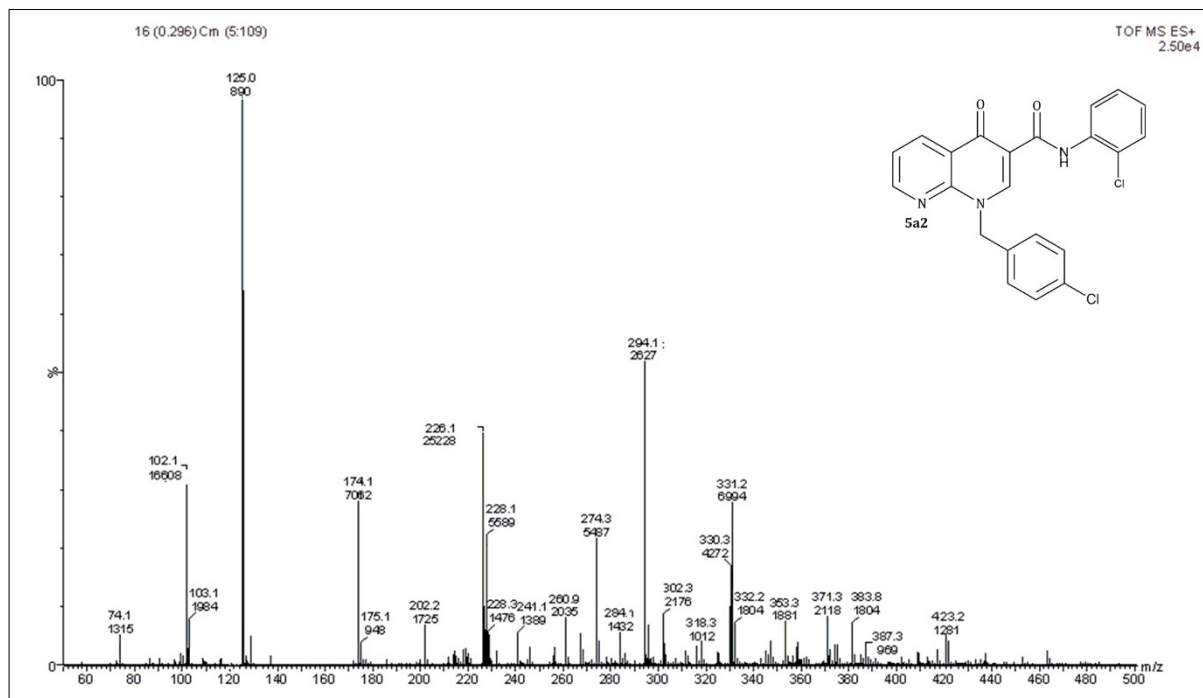

Fig:2. MASS spectra of compound 5a2

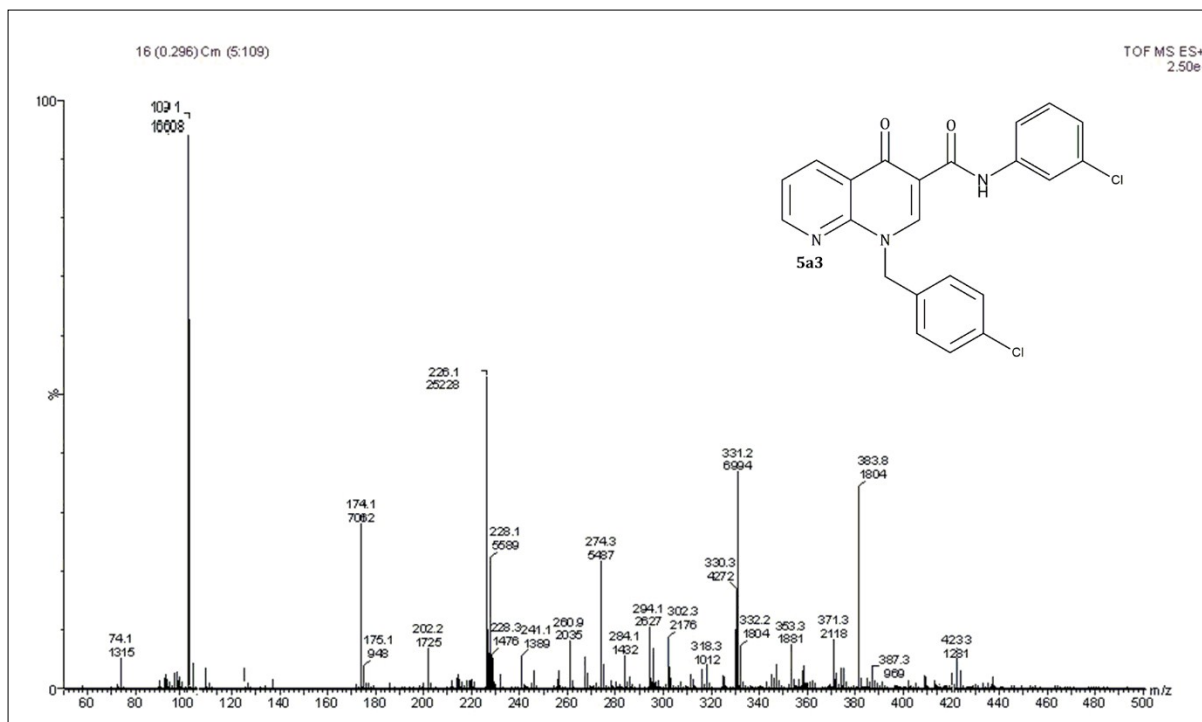

Fig:3. MASS spectra of compound 5a3

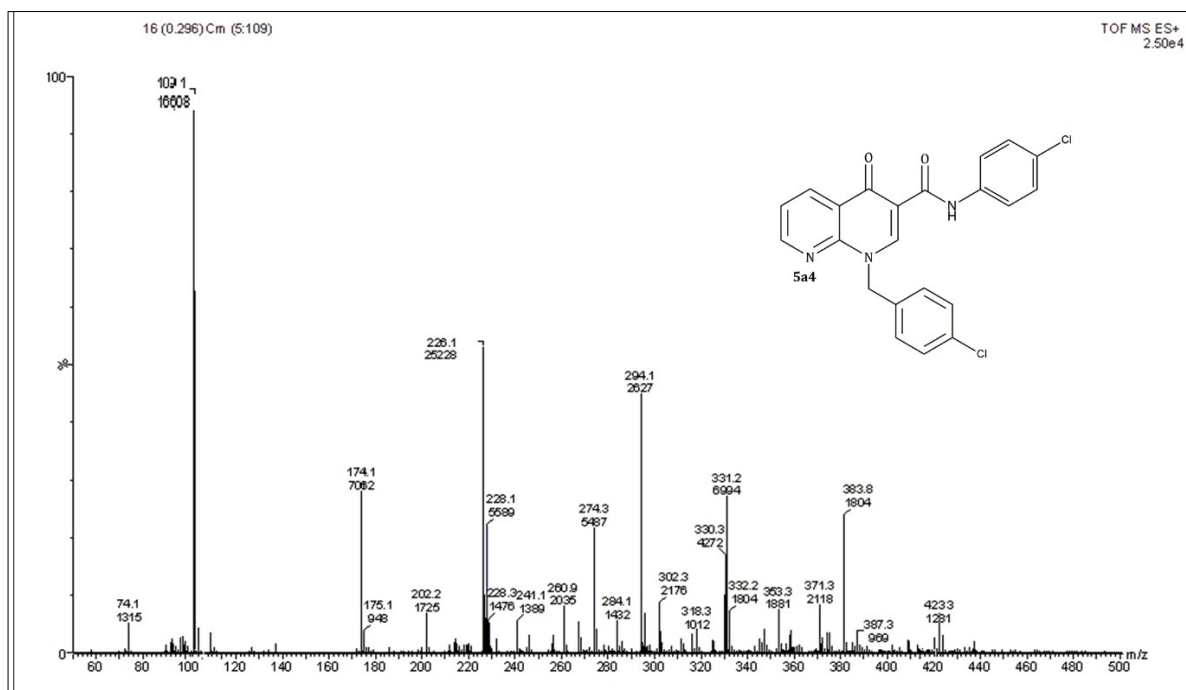

Fig:4. MASS spectra of compound 5a4

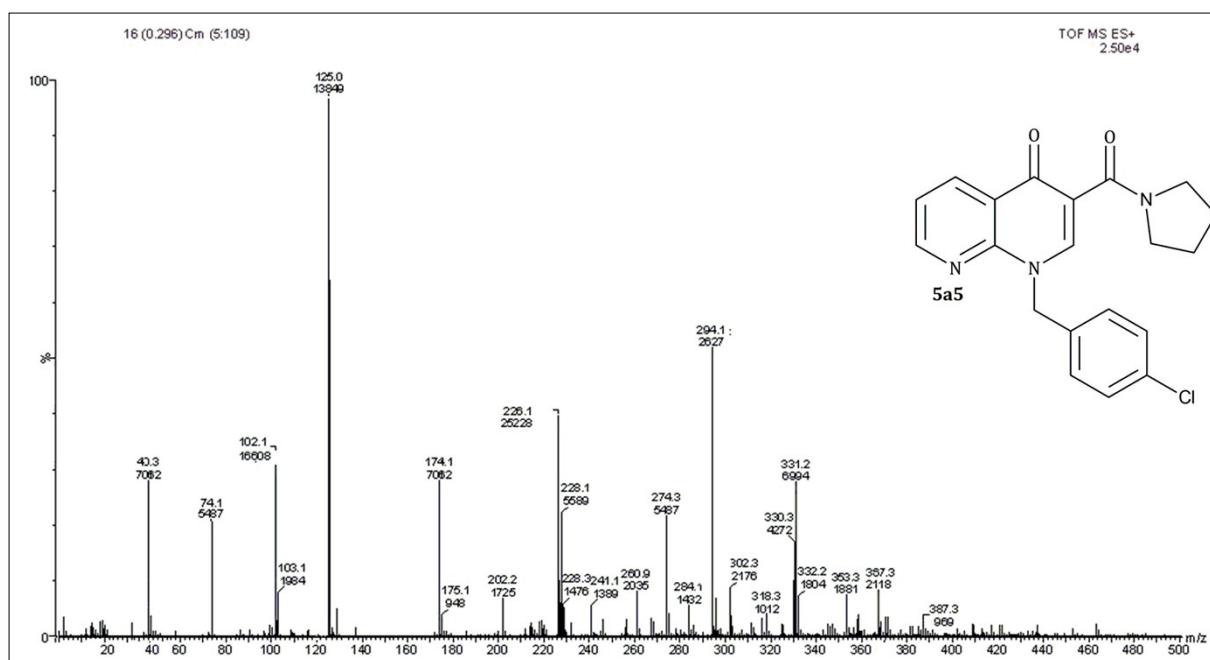

Fig:5. MASS spectra of compound 5a5

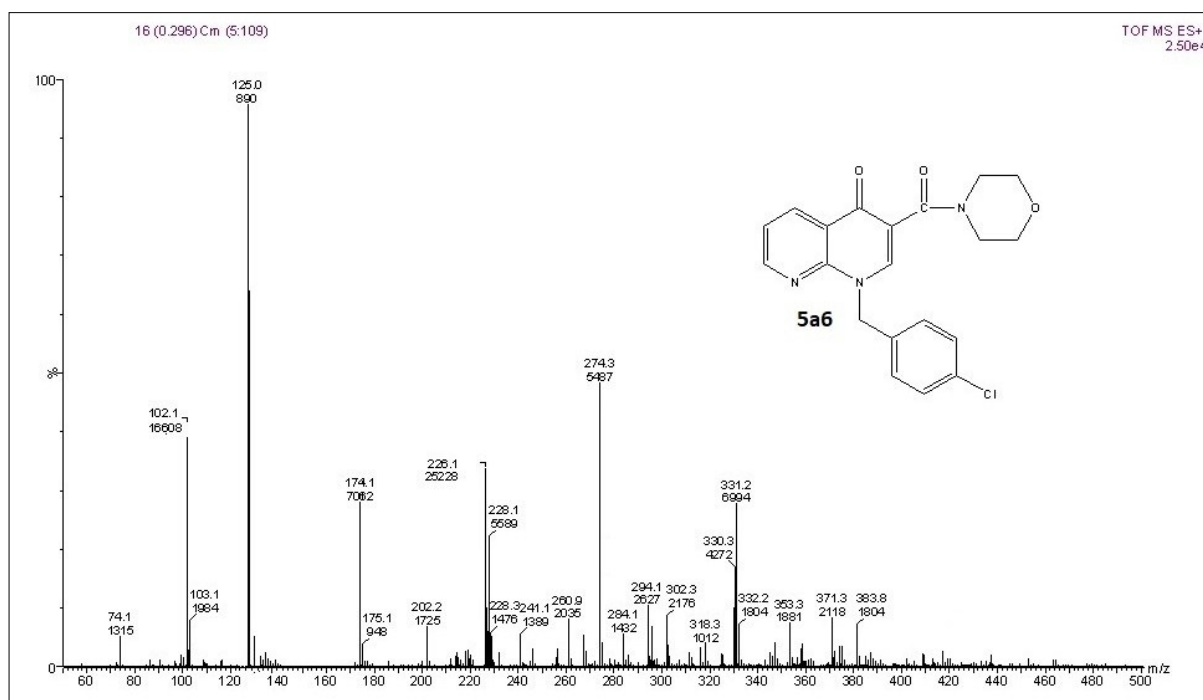

Fig:6. MASS spectra of compound 5a6

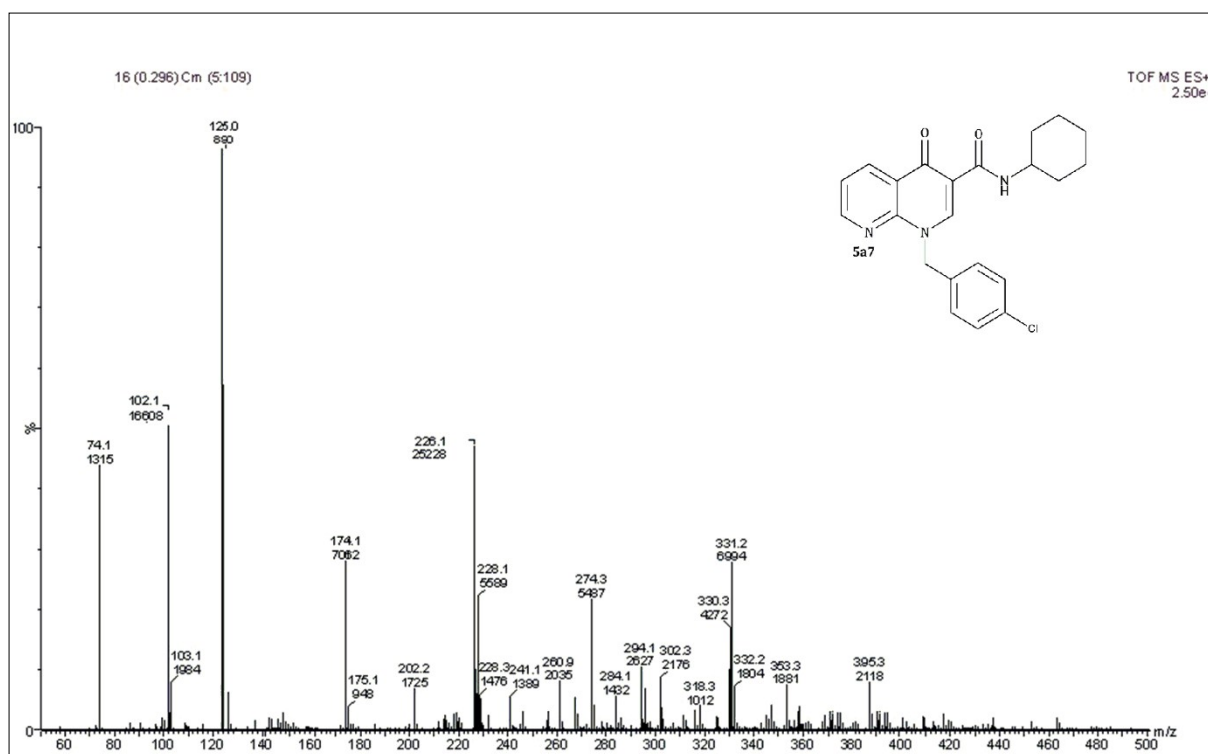

Fig:7. MASS spectra of compound 5a7

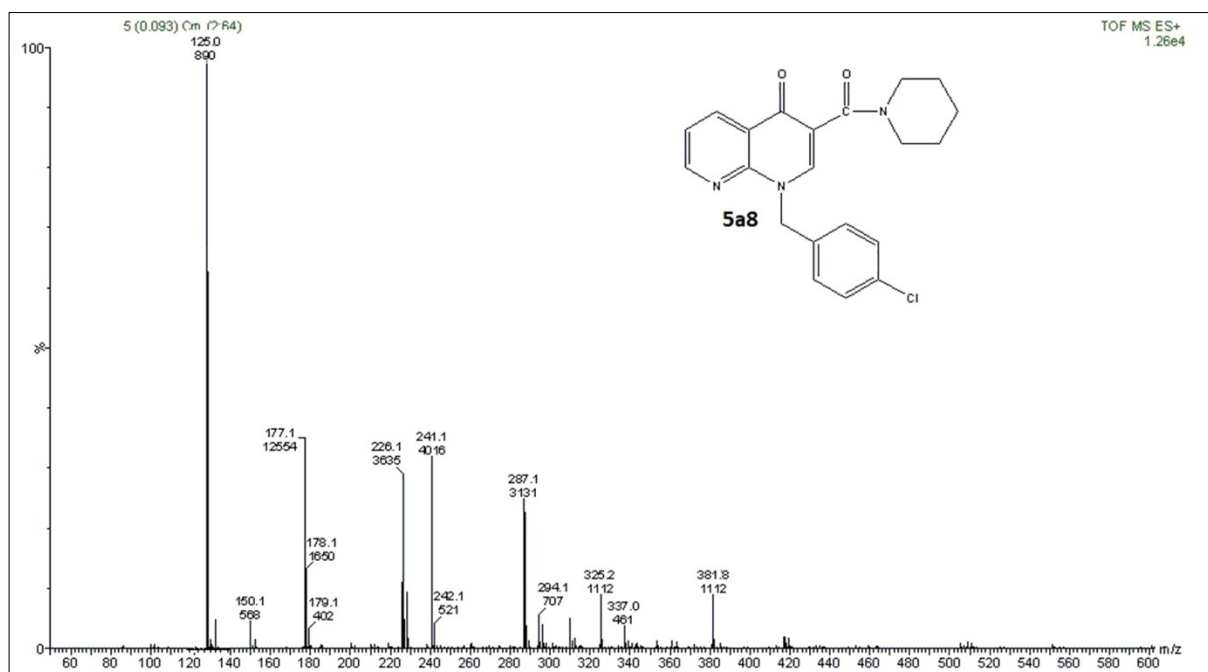

Fig:8. MASS spectra of compound 5a8

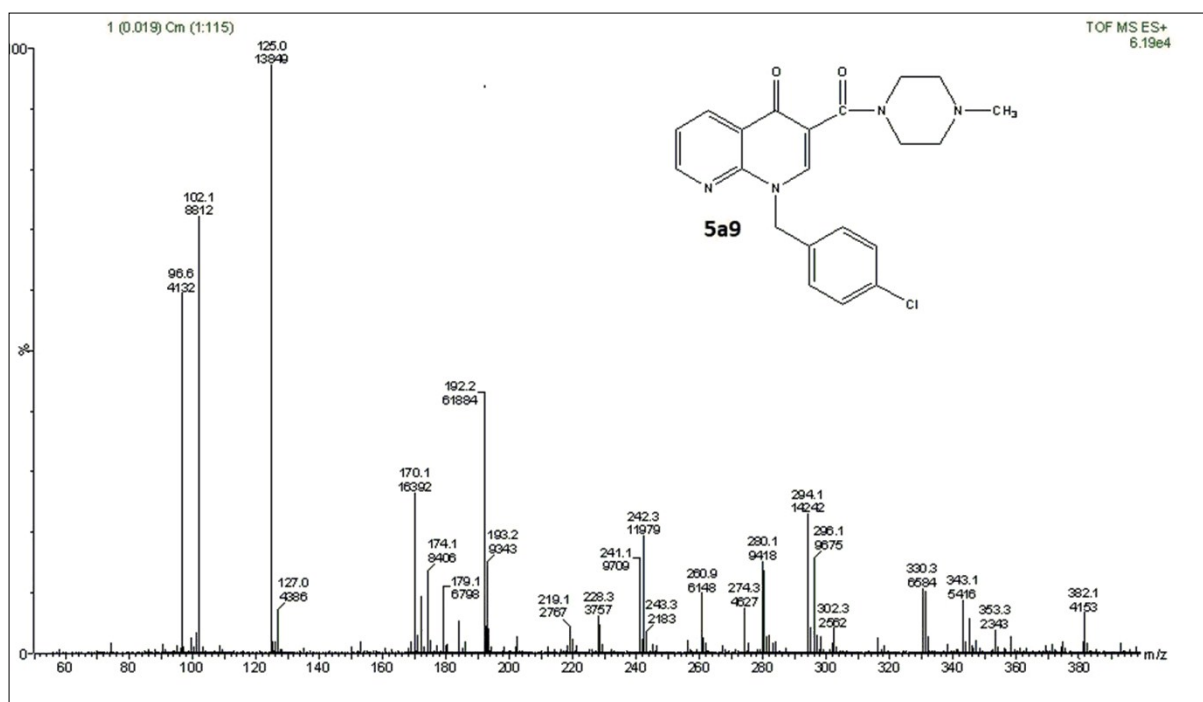

Fig:9. MASS spectra of compound 5a9

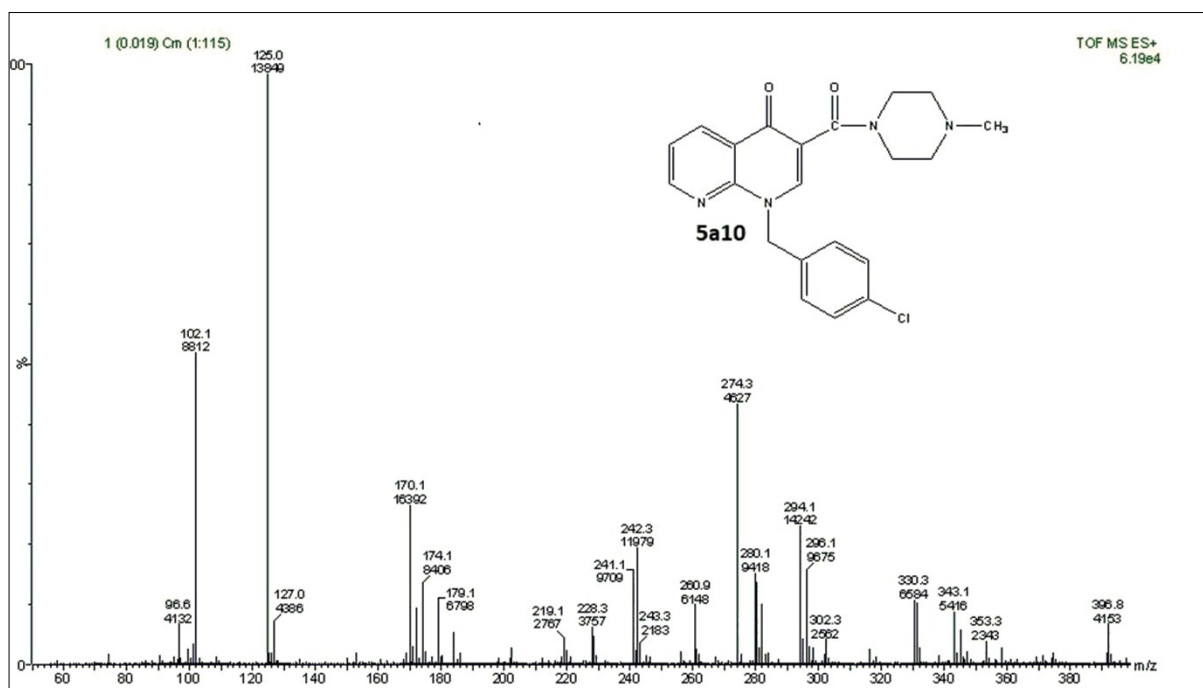

Fig:10. MASS spectra of compound 5a10

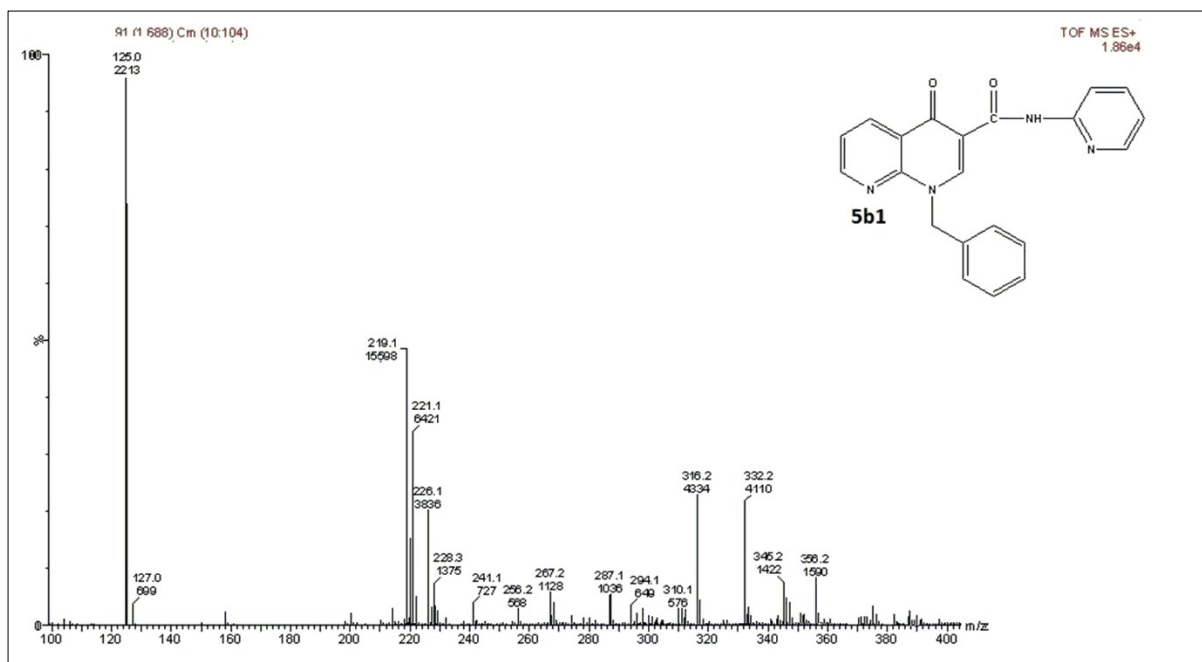

Fig:11. MASS spectra of compound 5b1

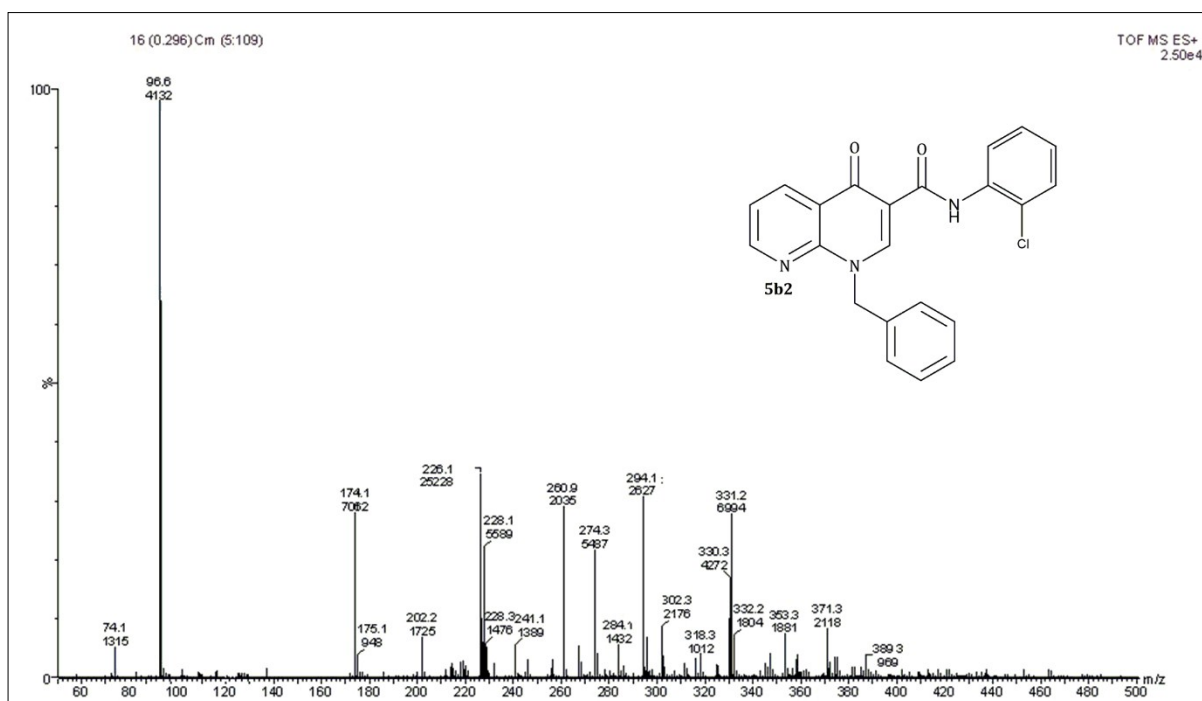

Fig:12. MASS spectra of compound 5b2

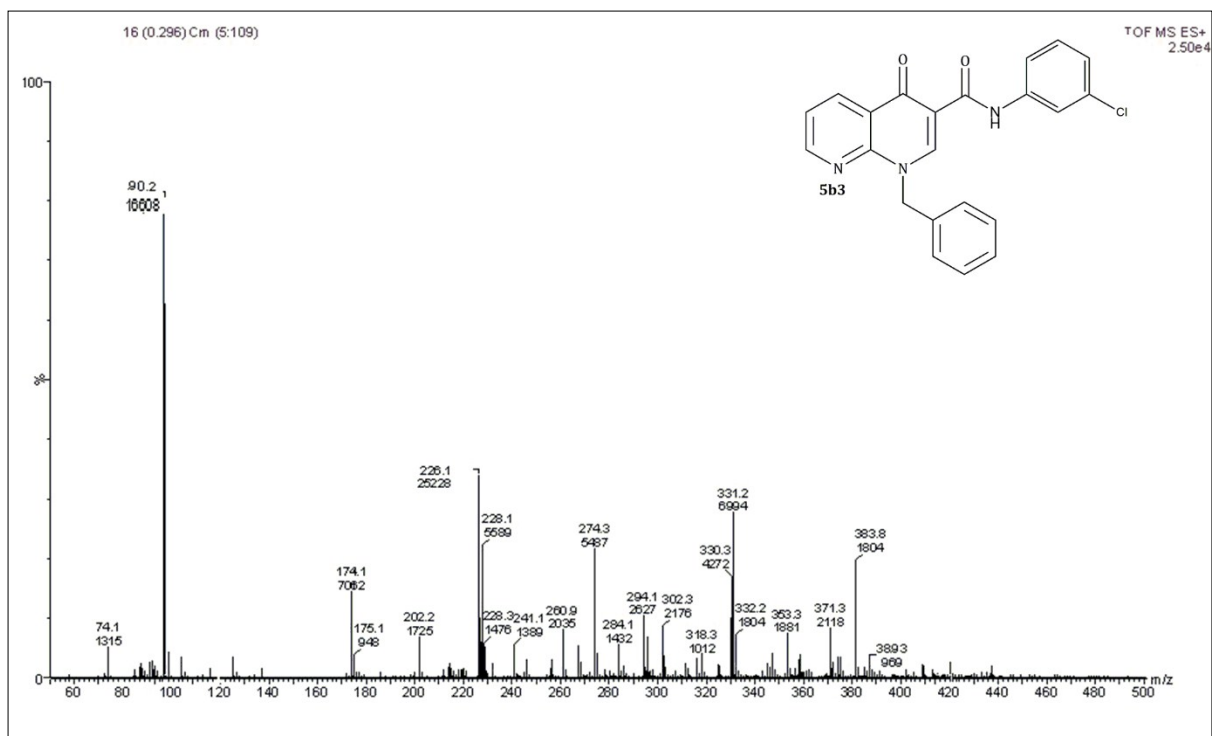

Fig:13. MASS spectra of compound 5b3

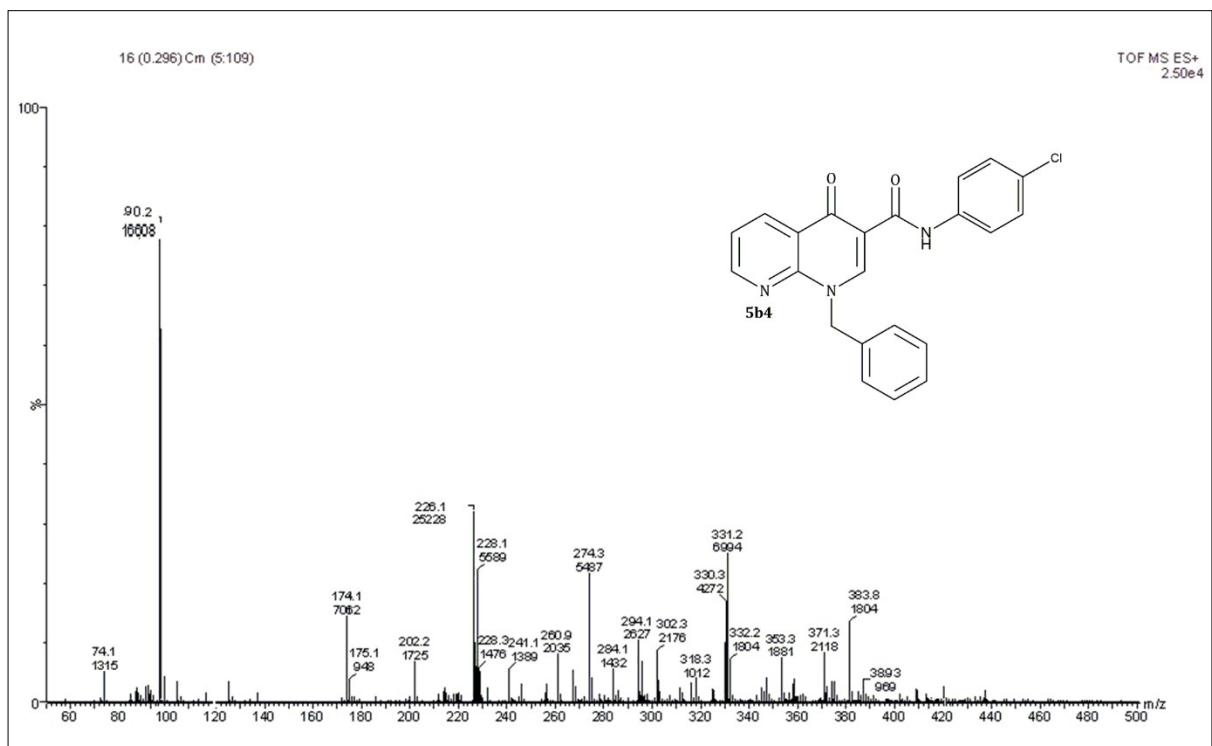

Fig:14. MASS spectra of compound 5b4



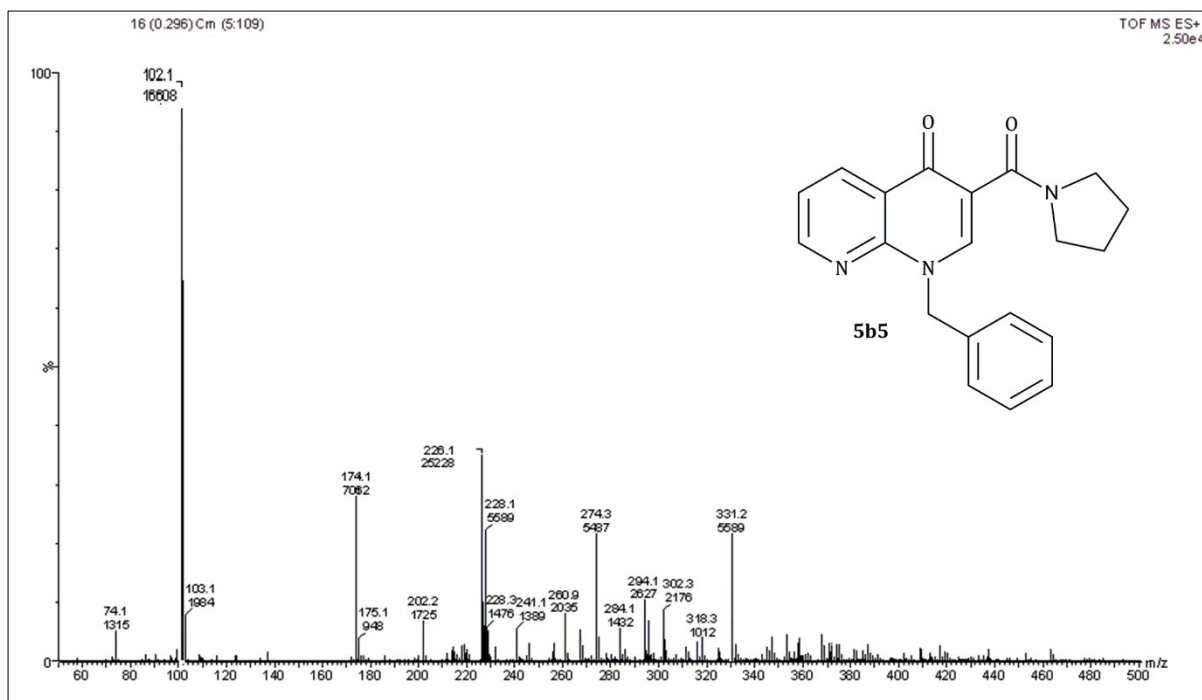

Fig:15. MASS spectra of compound 5b5

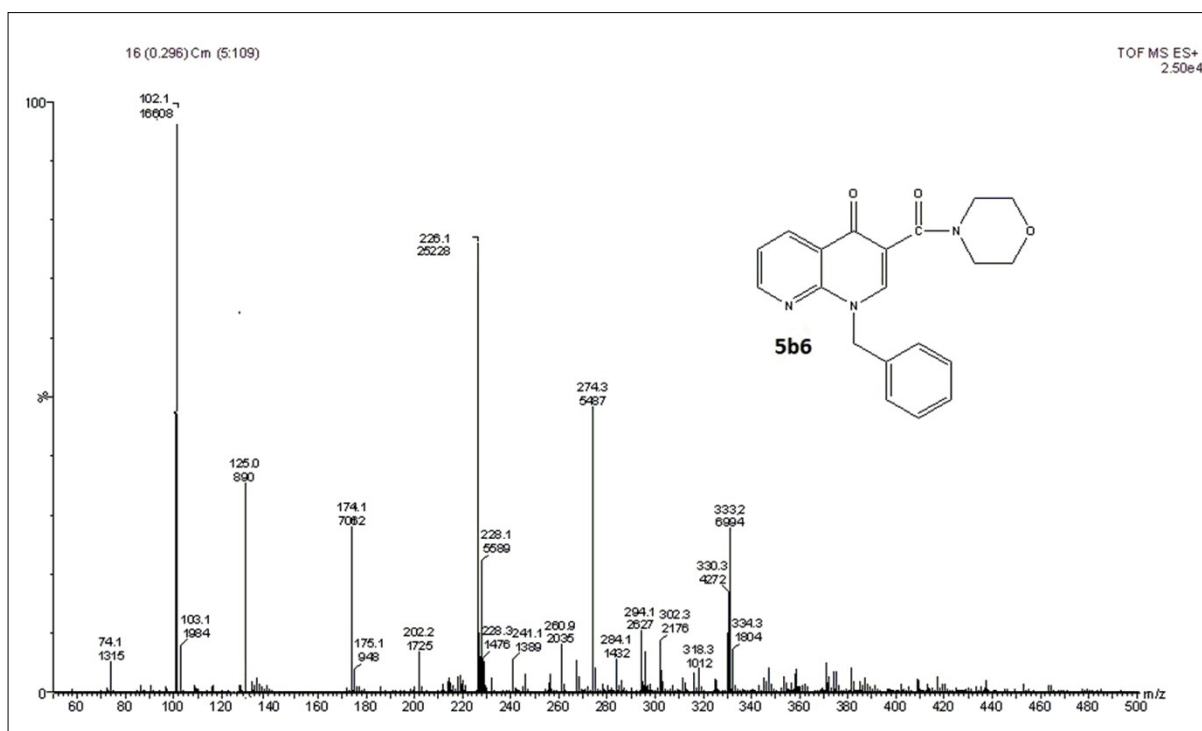

Fig:16. MASS spectra of compound 5b6

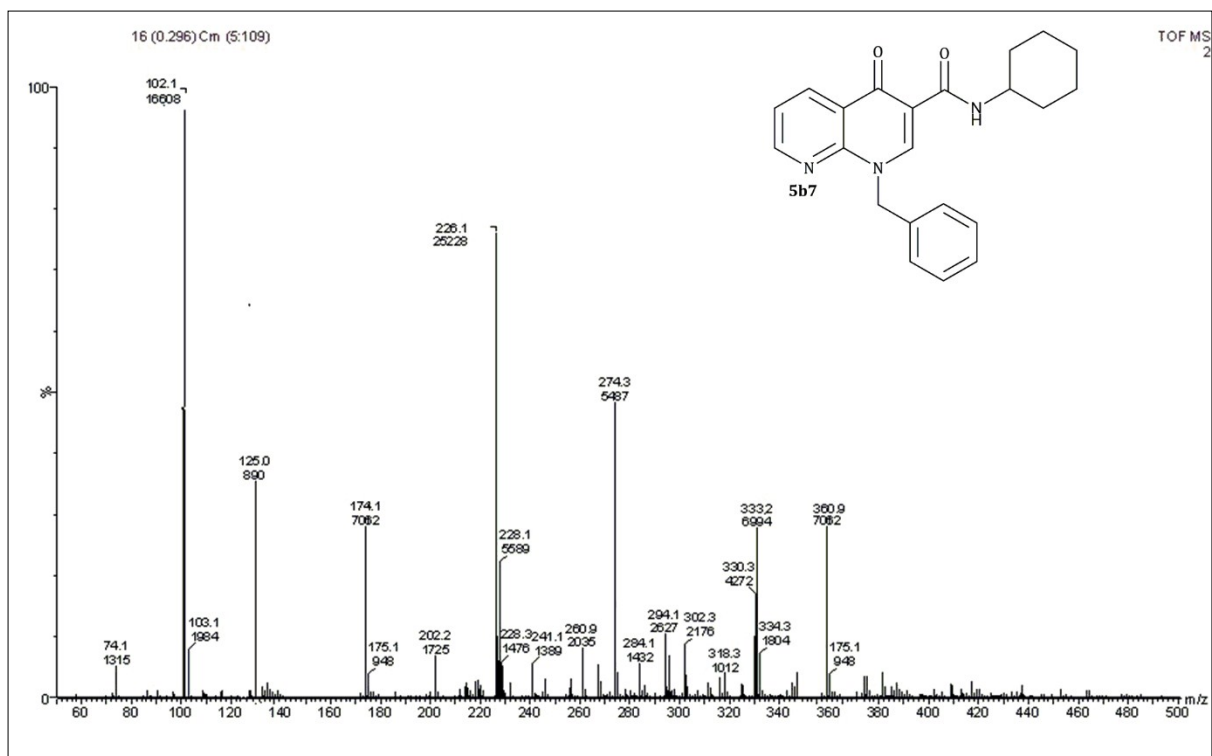

Fig:17. MASS spectra of compound 5b7

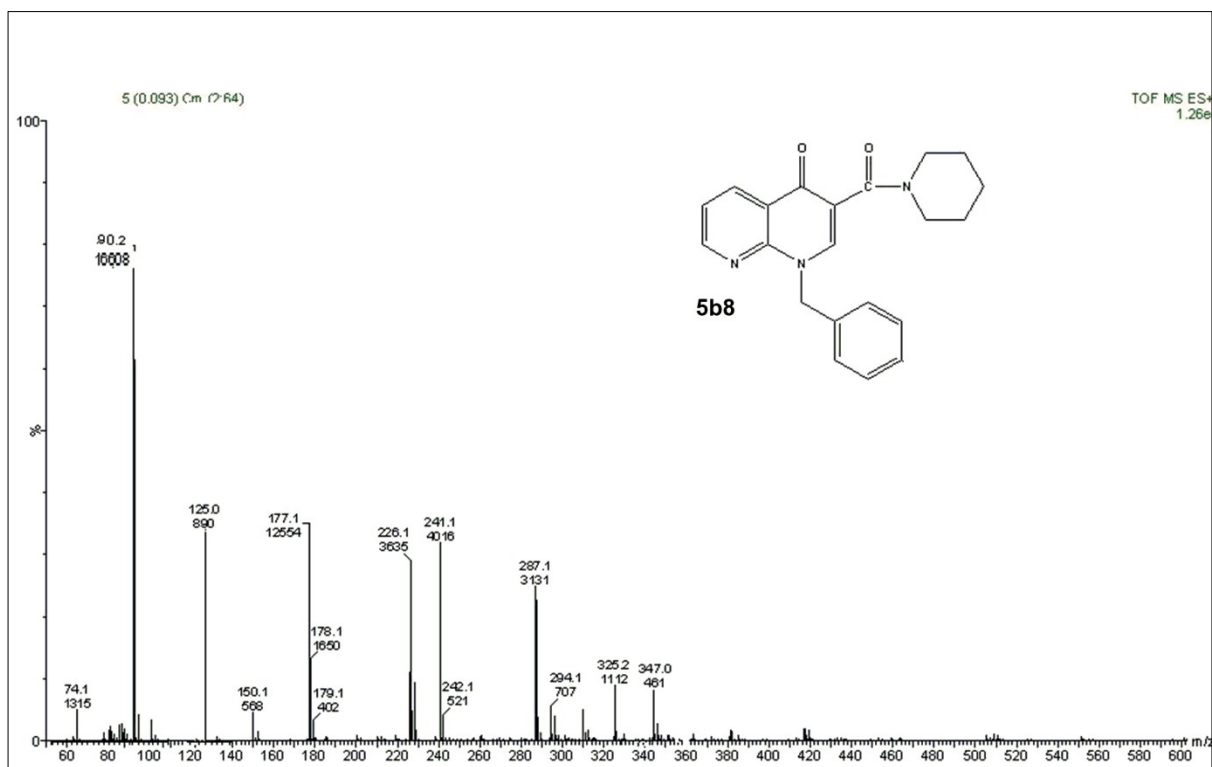

Fig:18. MASS spectra of compound 5b8

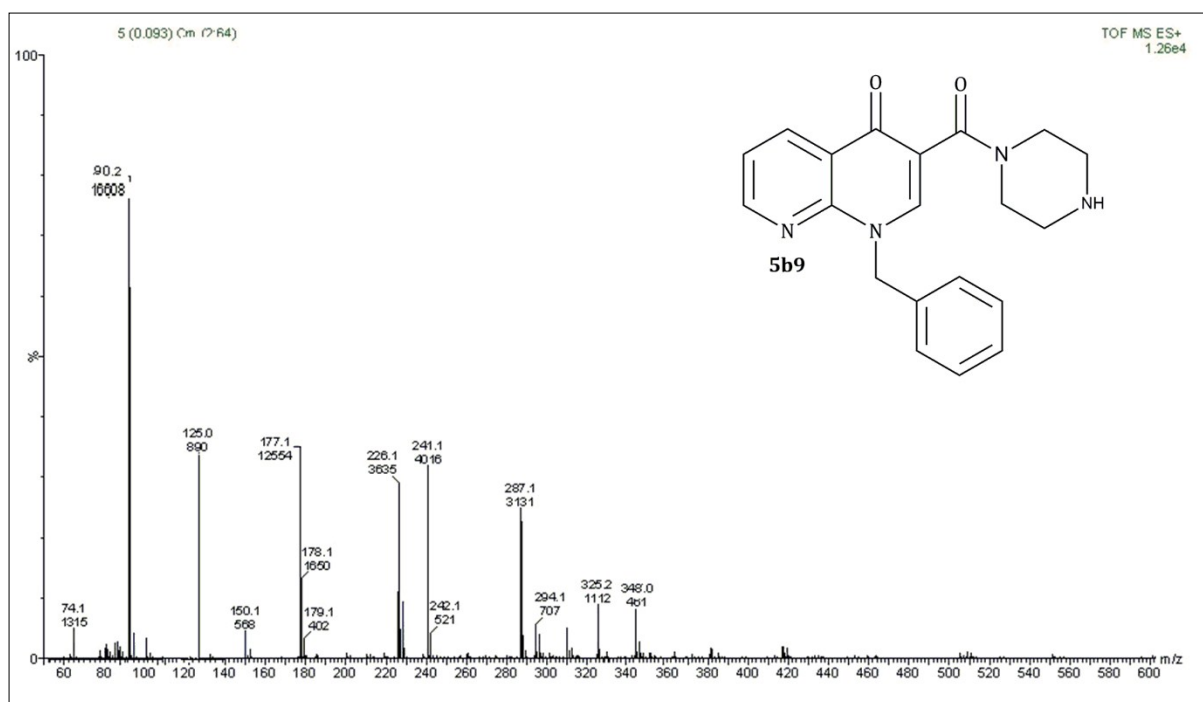

Fig:19. MASS spectra of compound 5b9

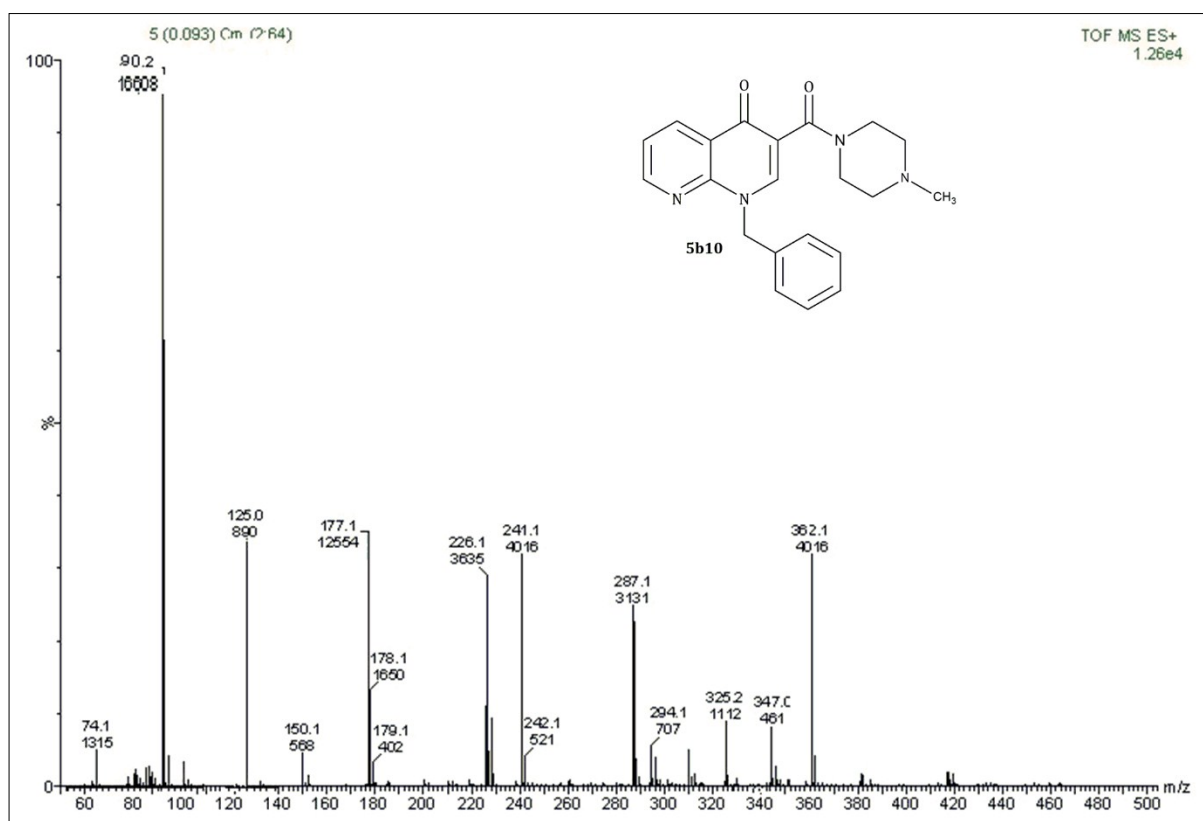

Fig:20. MASS spectra of compound 5b10

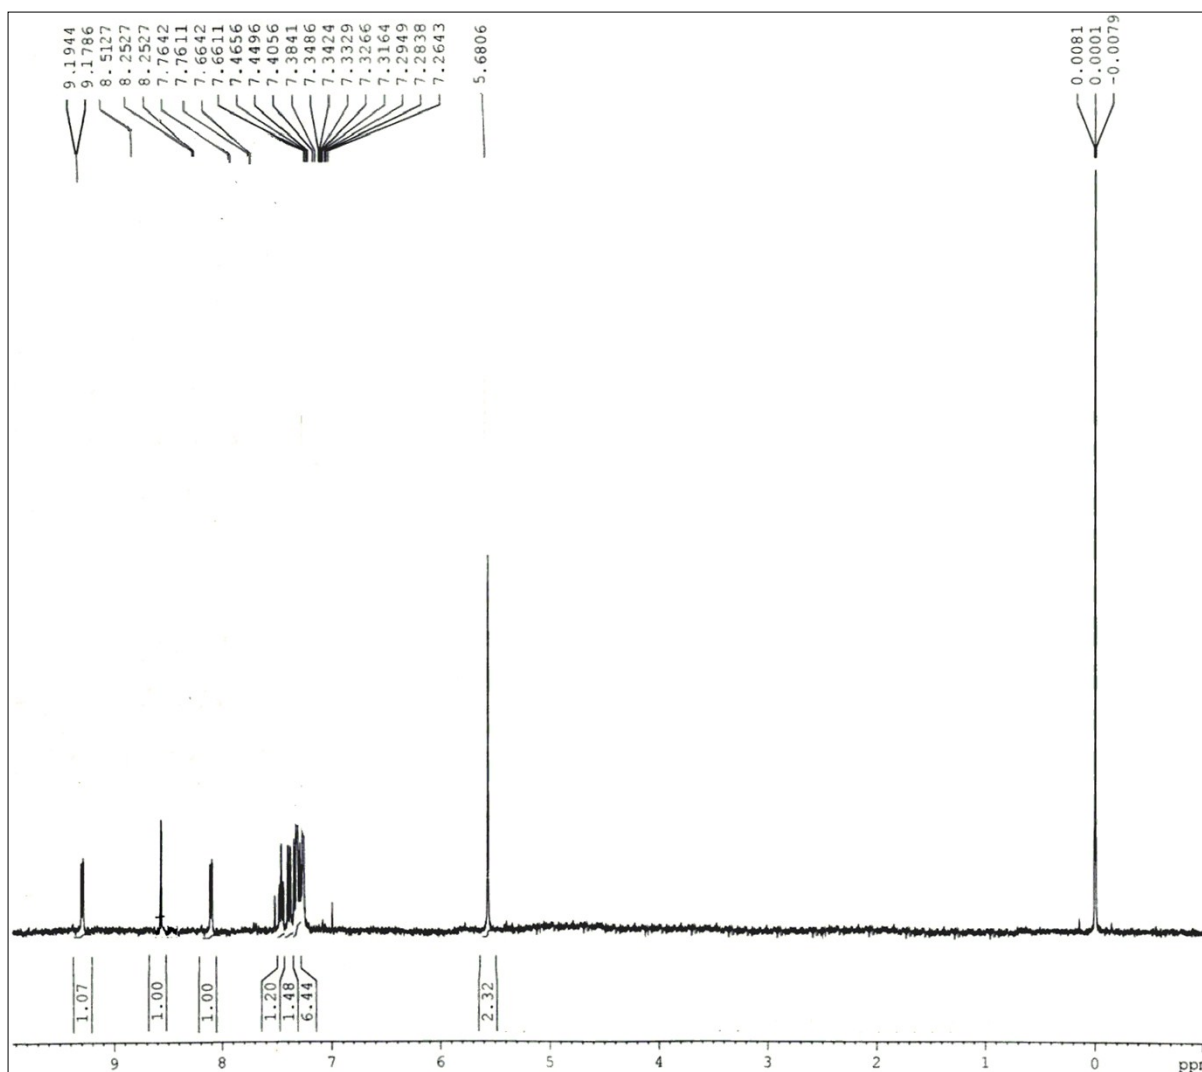

Fig:21. NMR spectra of compound 5a1

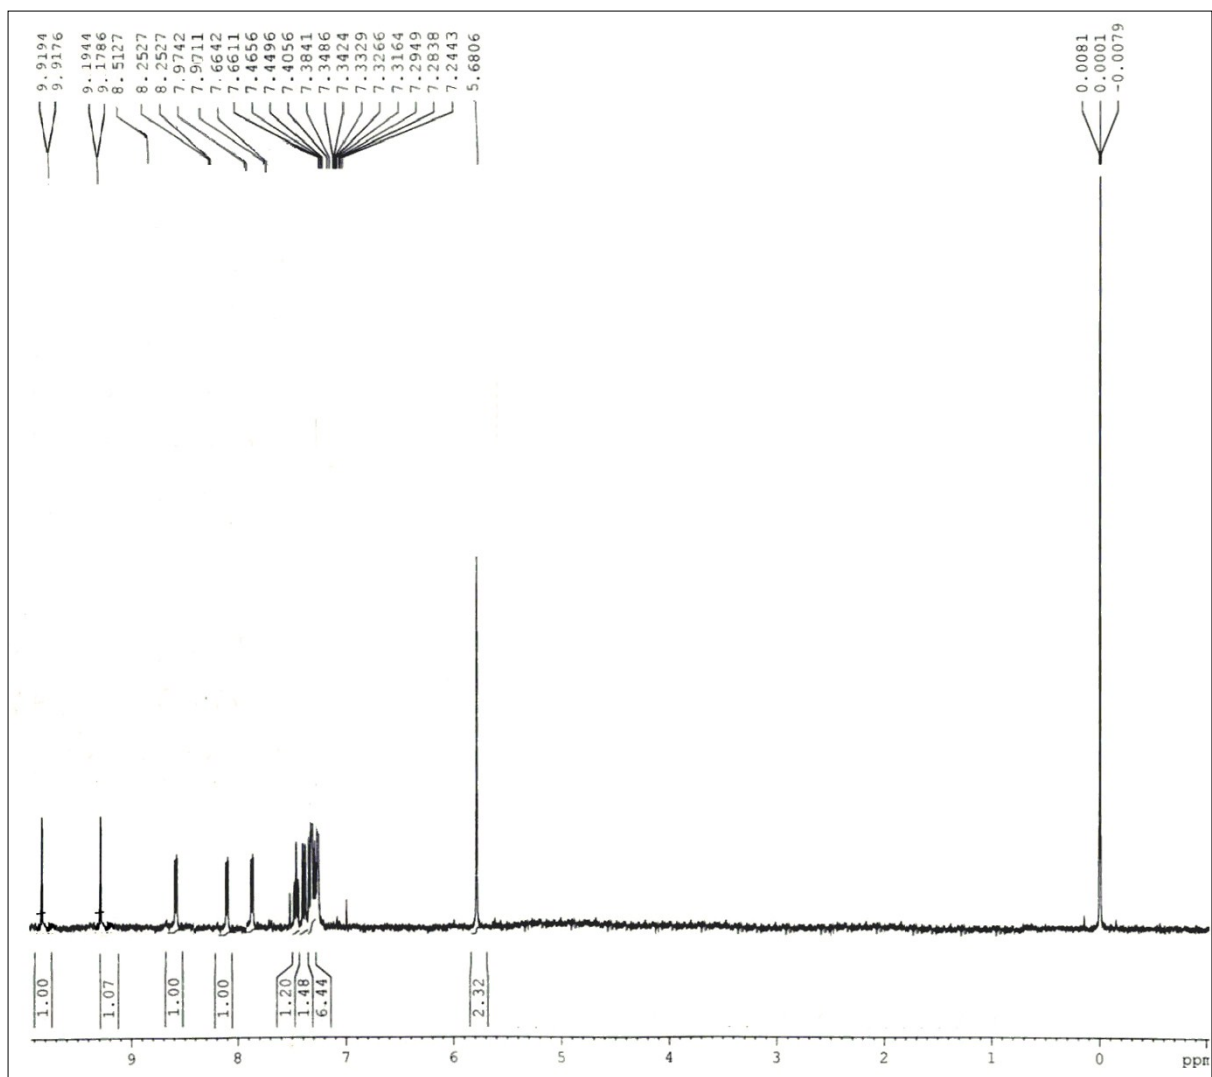

Fig:22. NMR spectra of compound 5a2

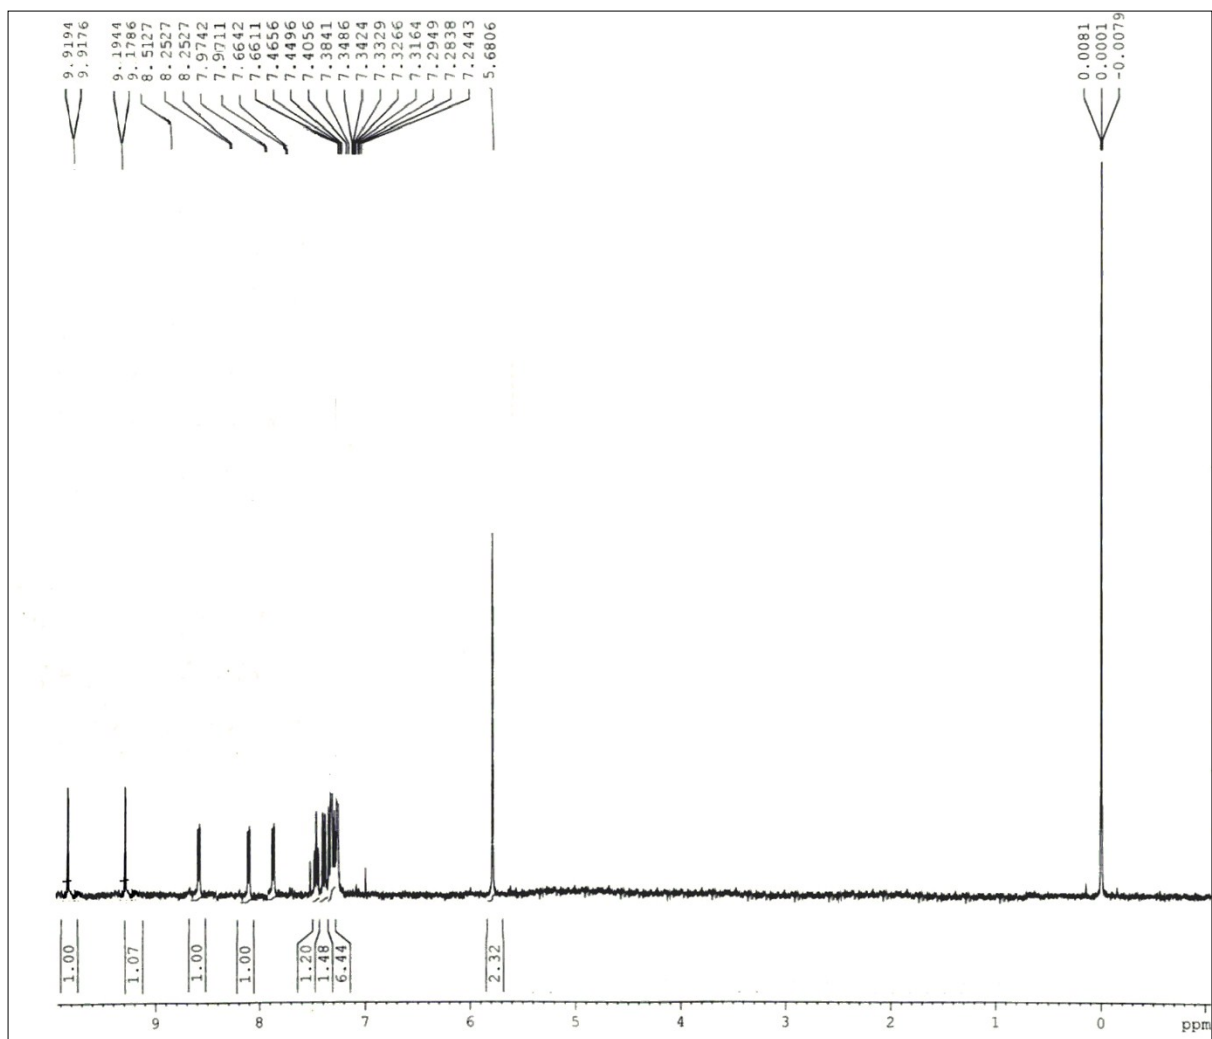

Fig:23. NMR spectra of compound 5a3

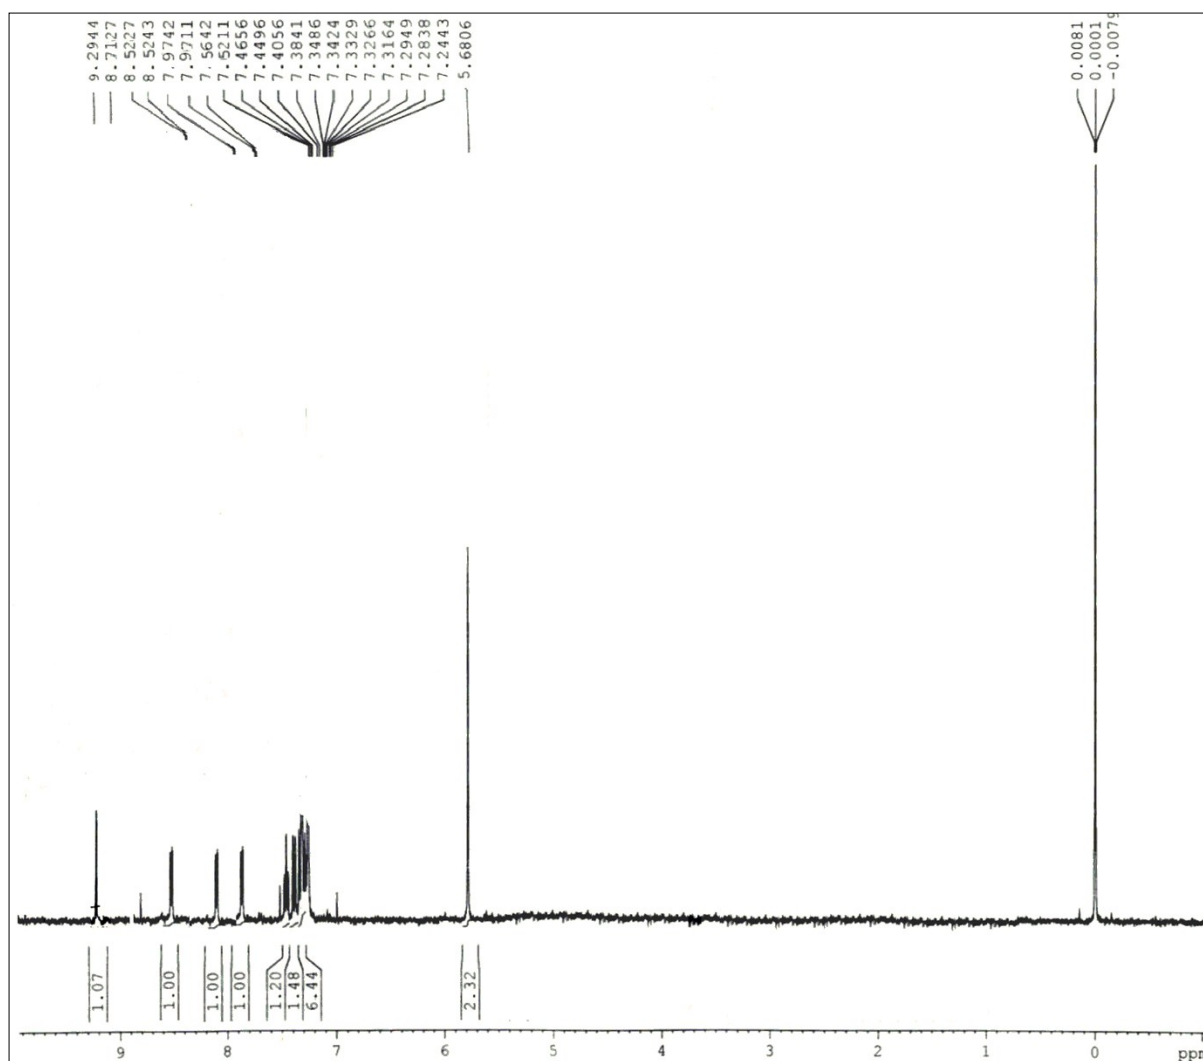

Fig:24. NMR spectra of compound 5a4

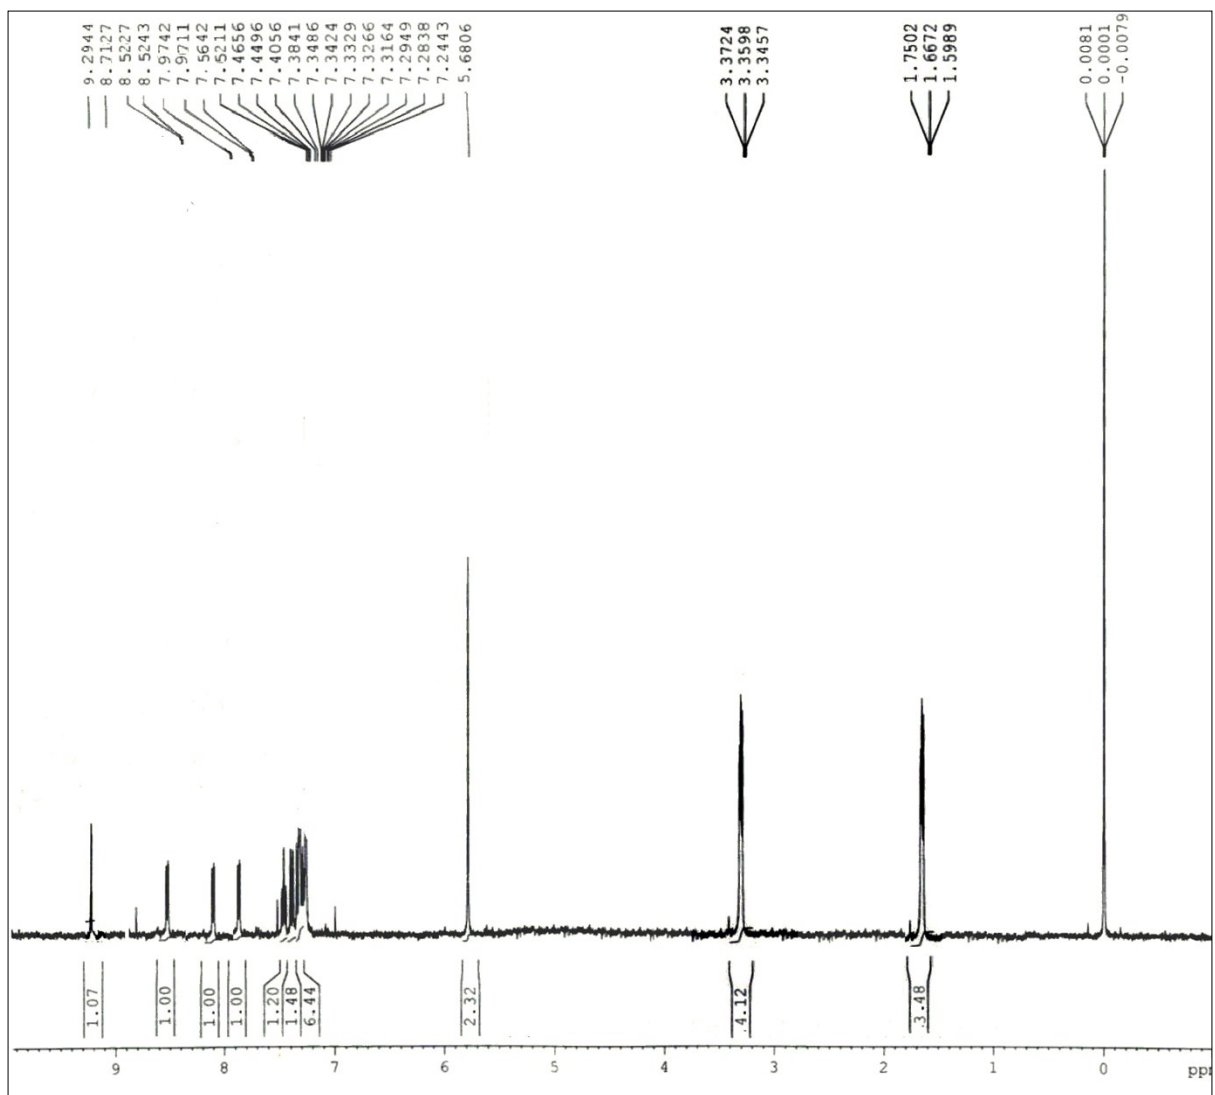

Fig:25. NMR spectra of compound 5a5



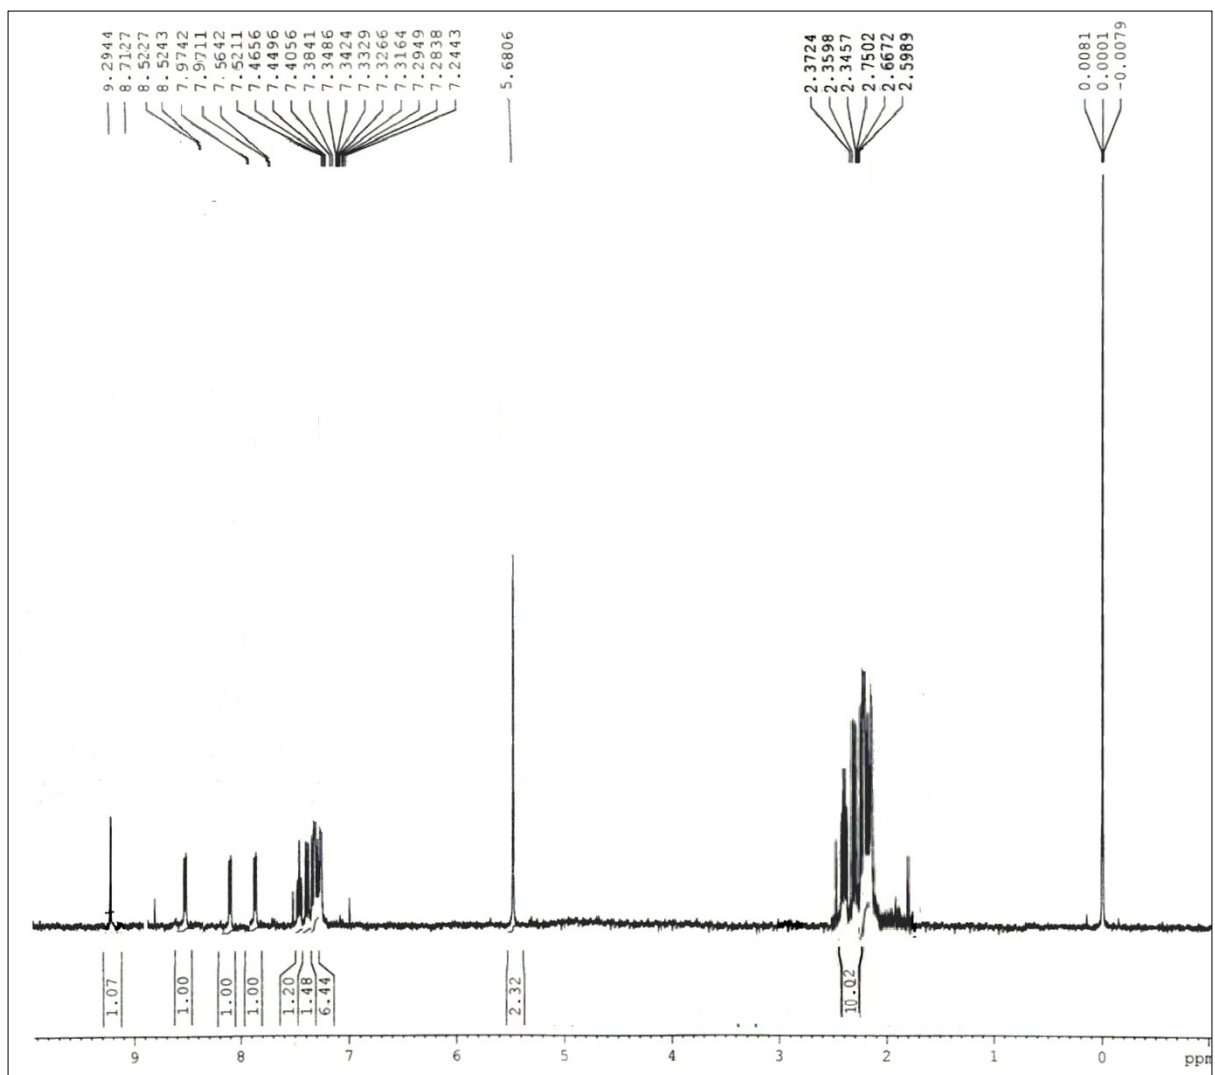

Fig:26. NMR spectra of compound 5a6

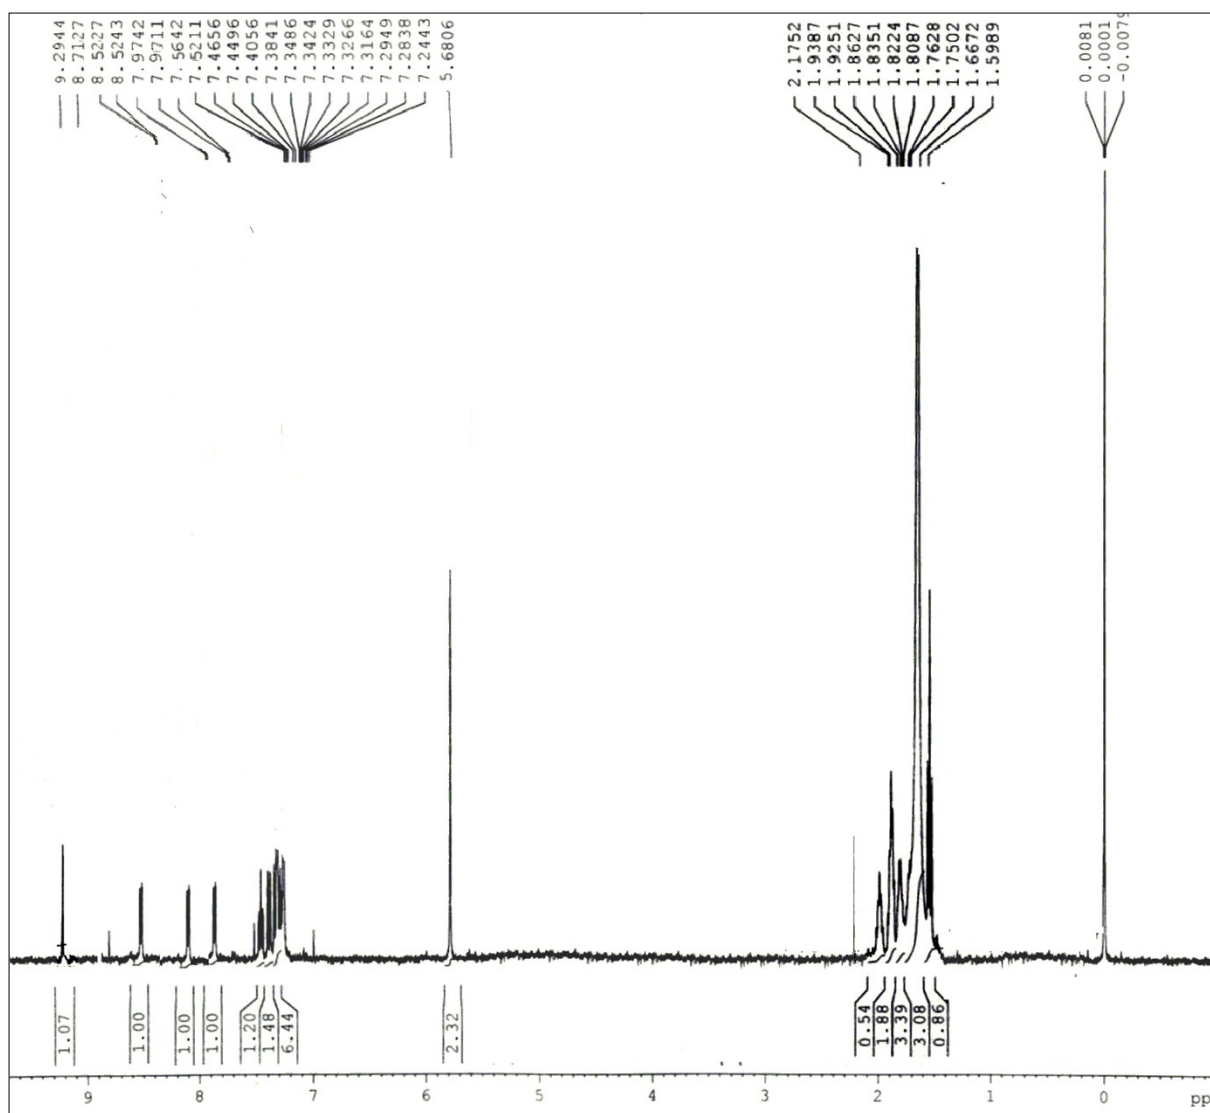

Fig:27. NMR spectra of compound 5a7

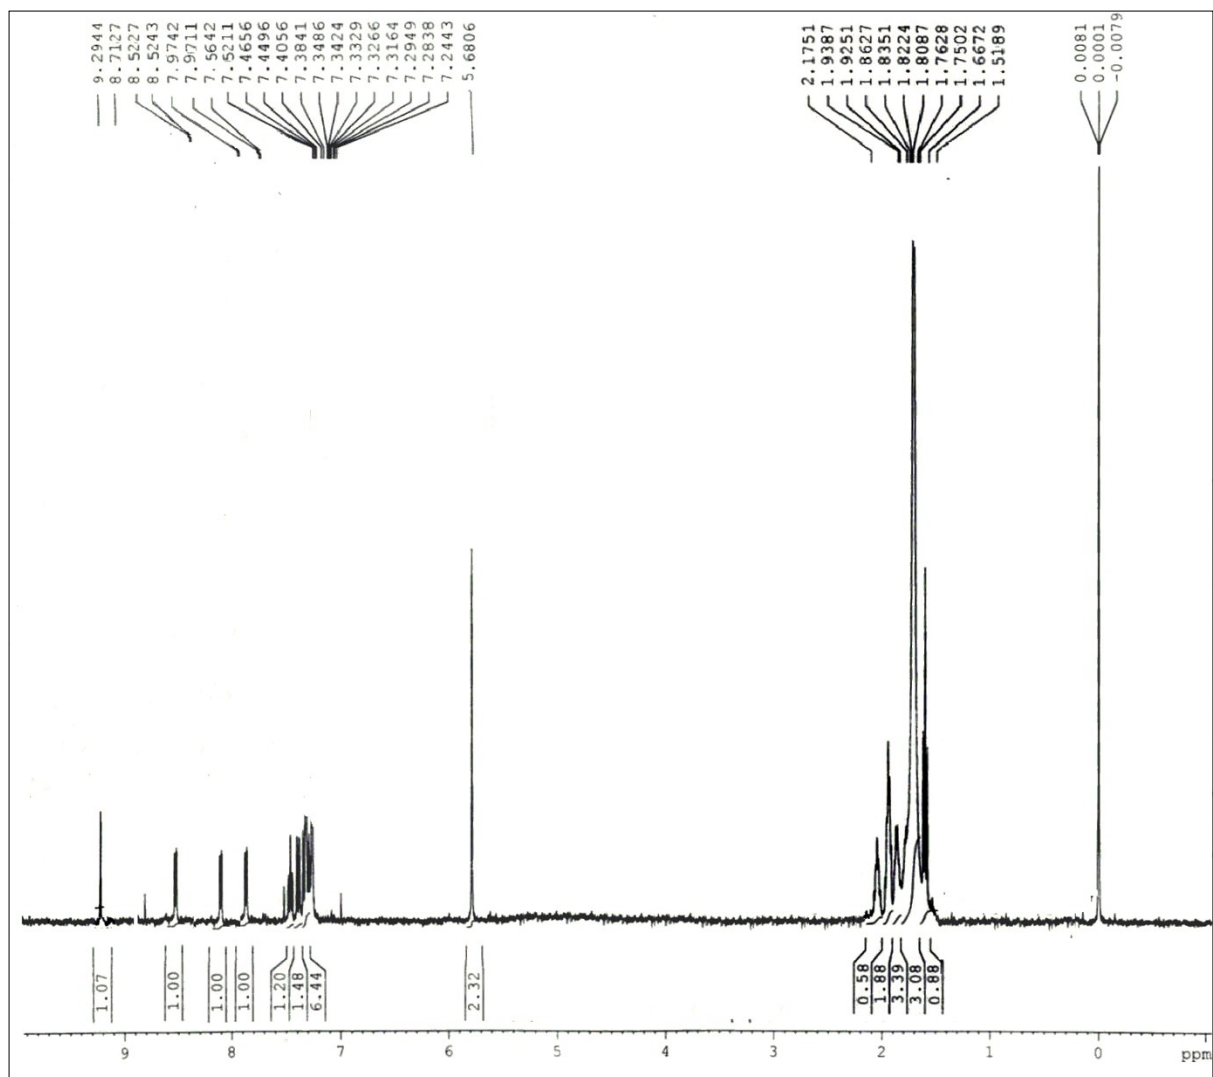

Fig:28. NMR spectra of compound 5a8

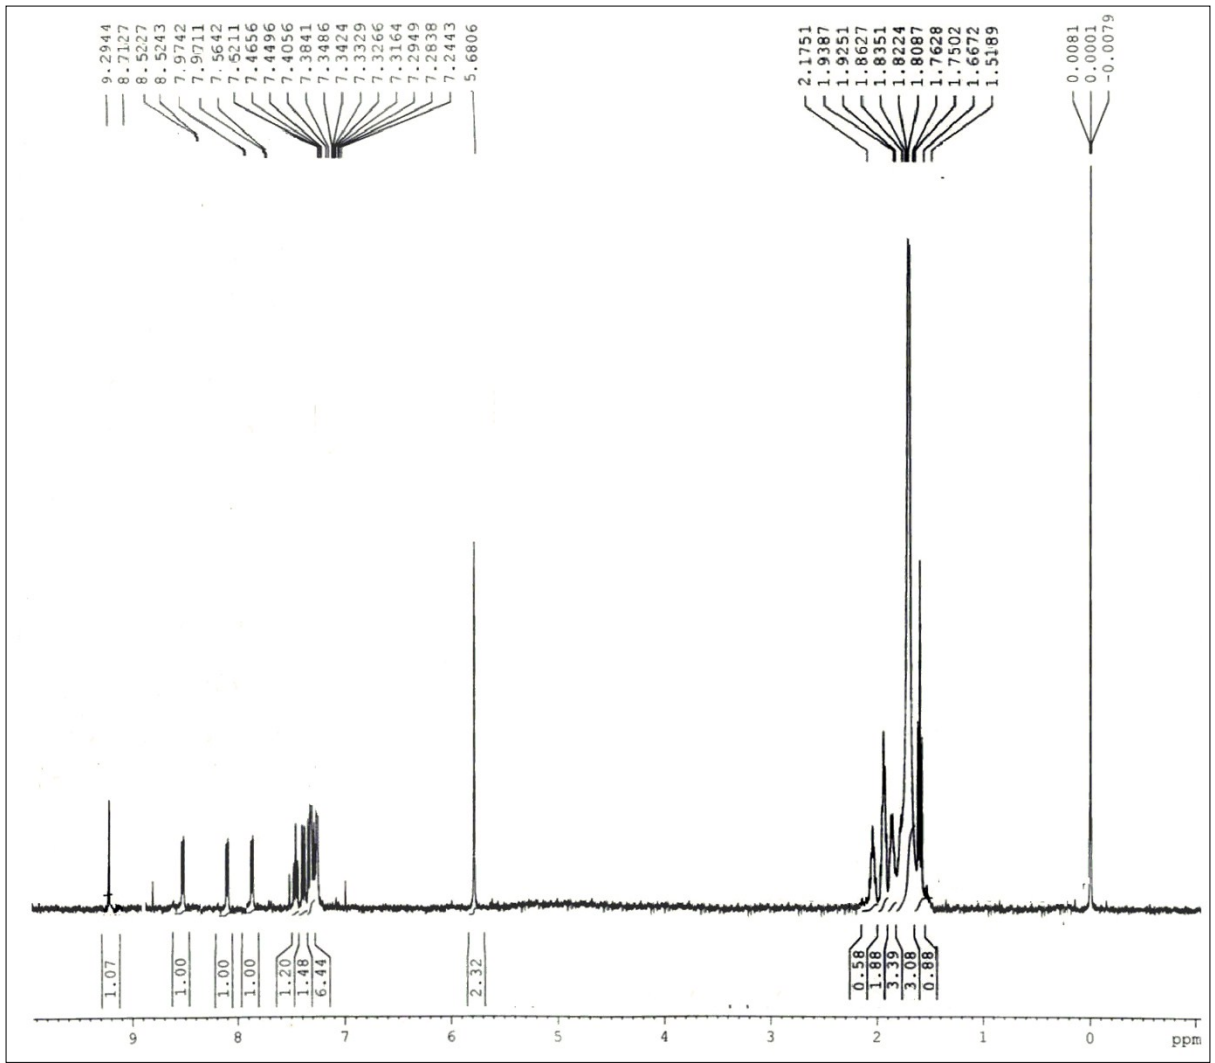

Fig:29. NMR spectra of compound 5a9

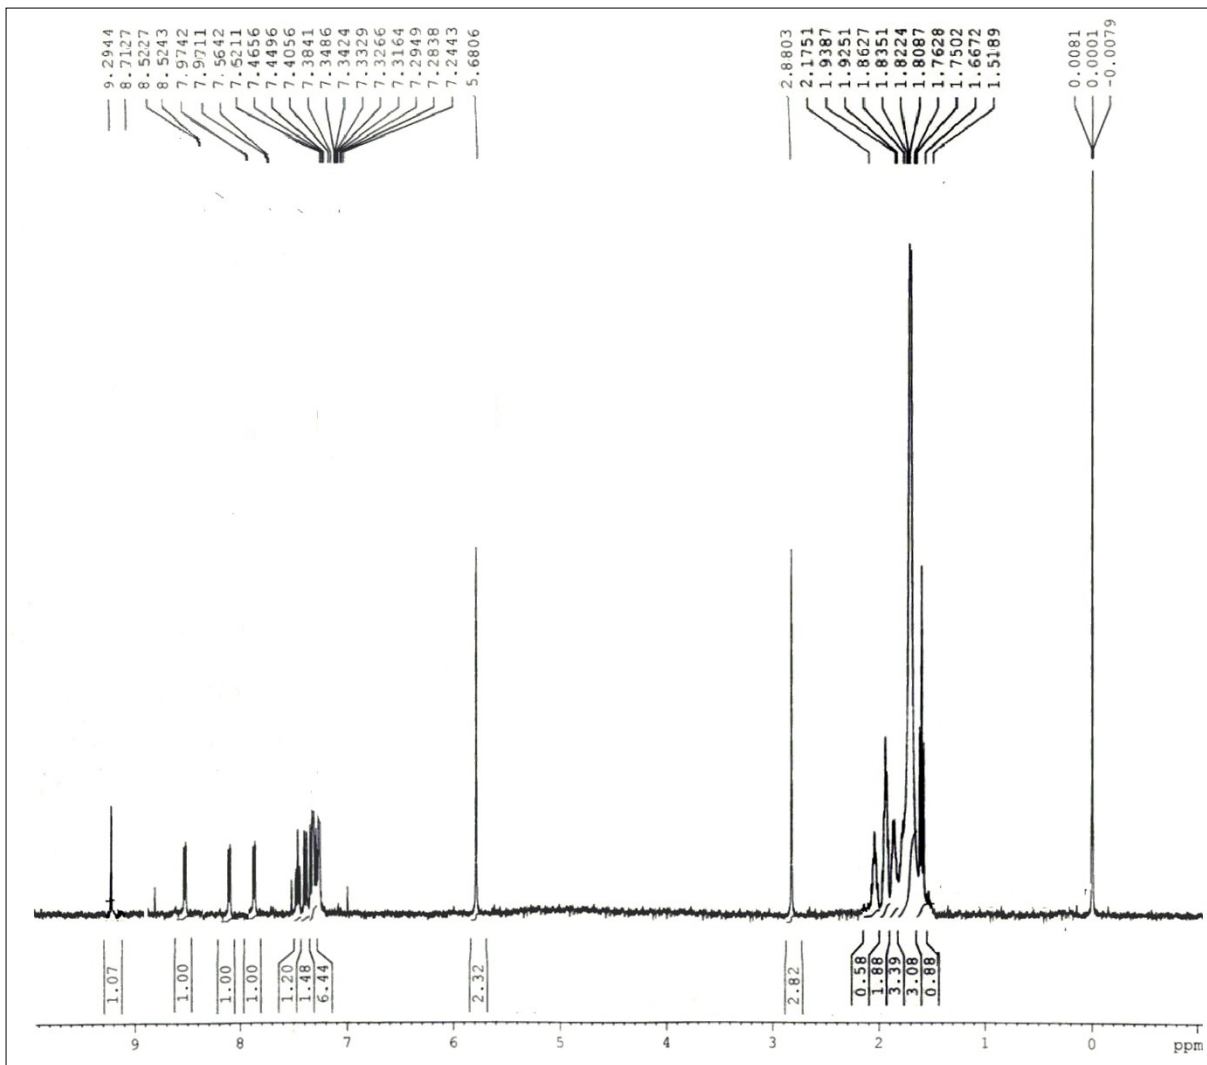

Fig:30. NMR spectra of compound 5a10

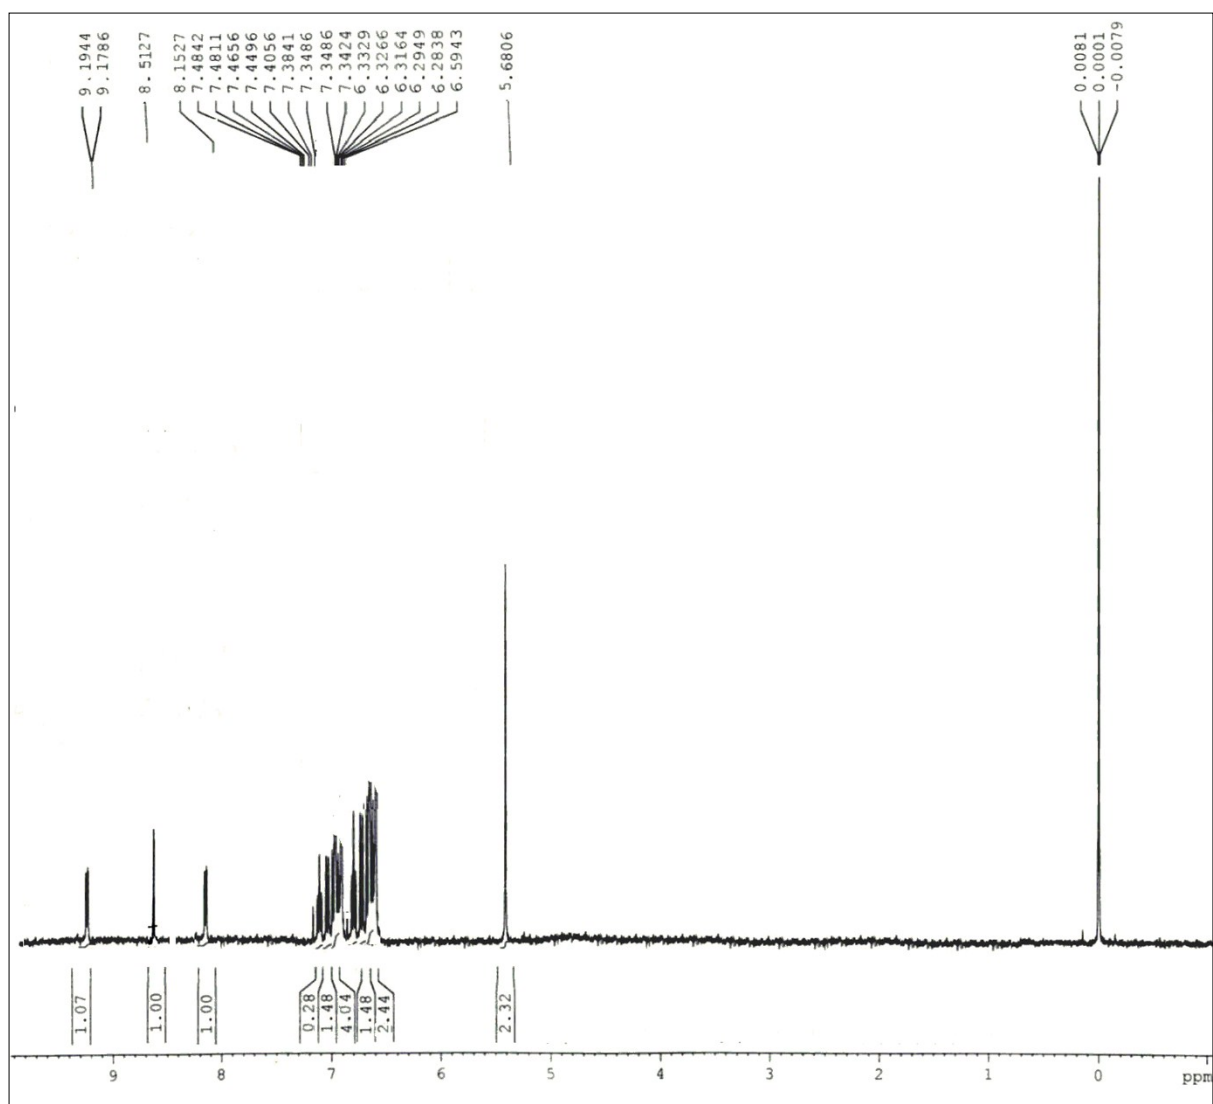

Fig:31. NMR spectra of compound 5b1

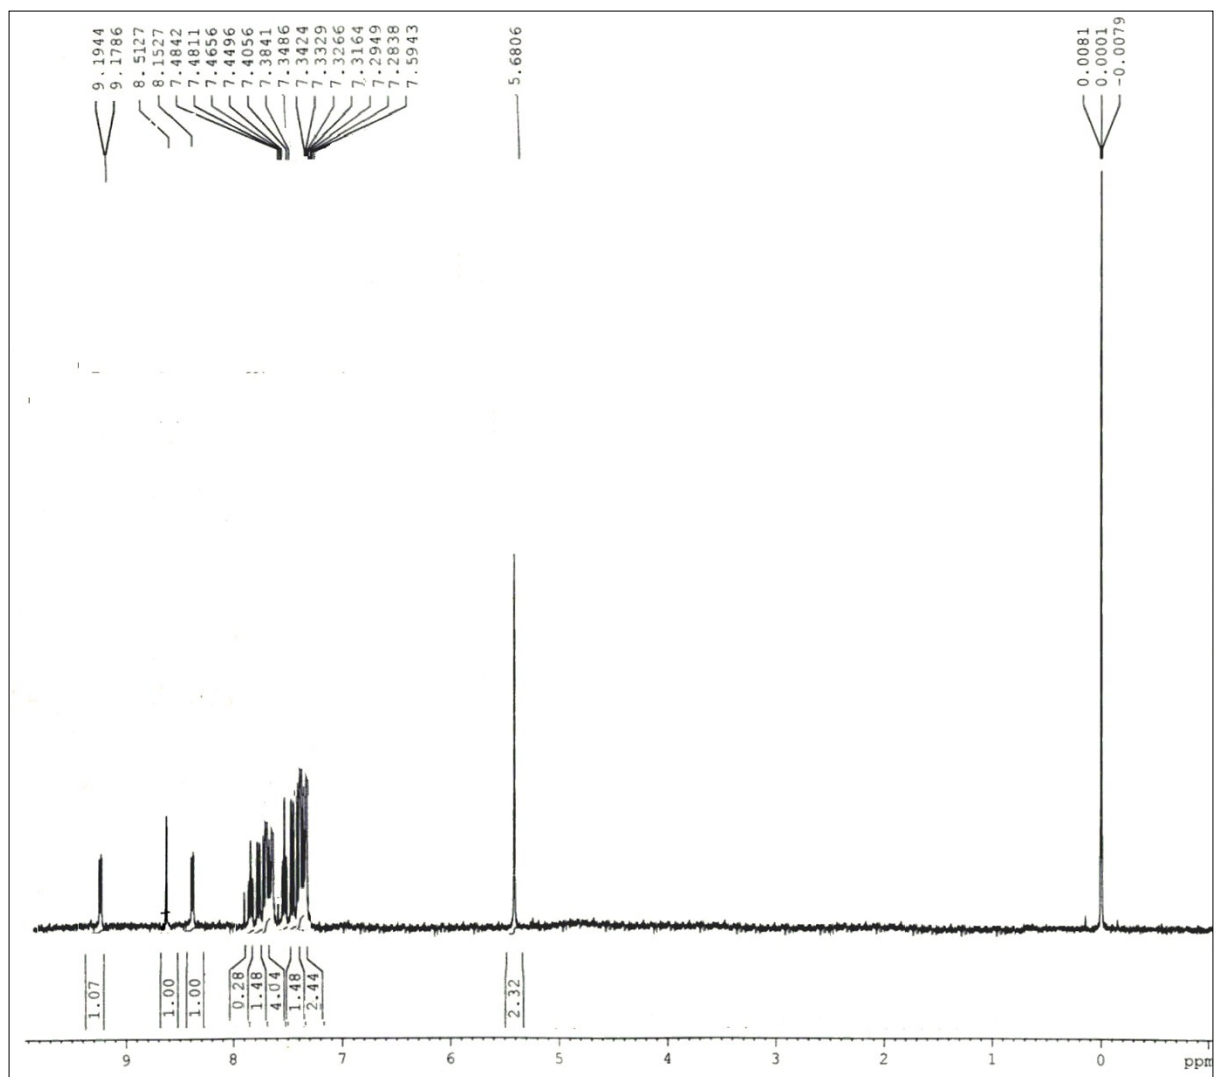

Fig:32. NMR spectra of compound 5b2

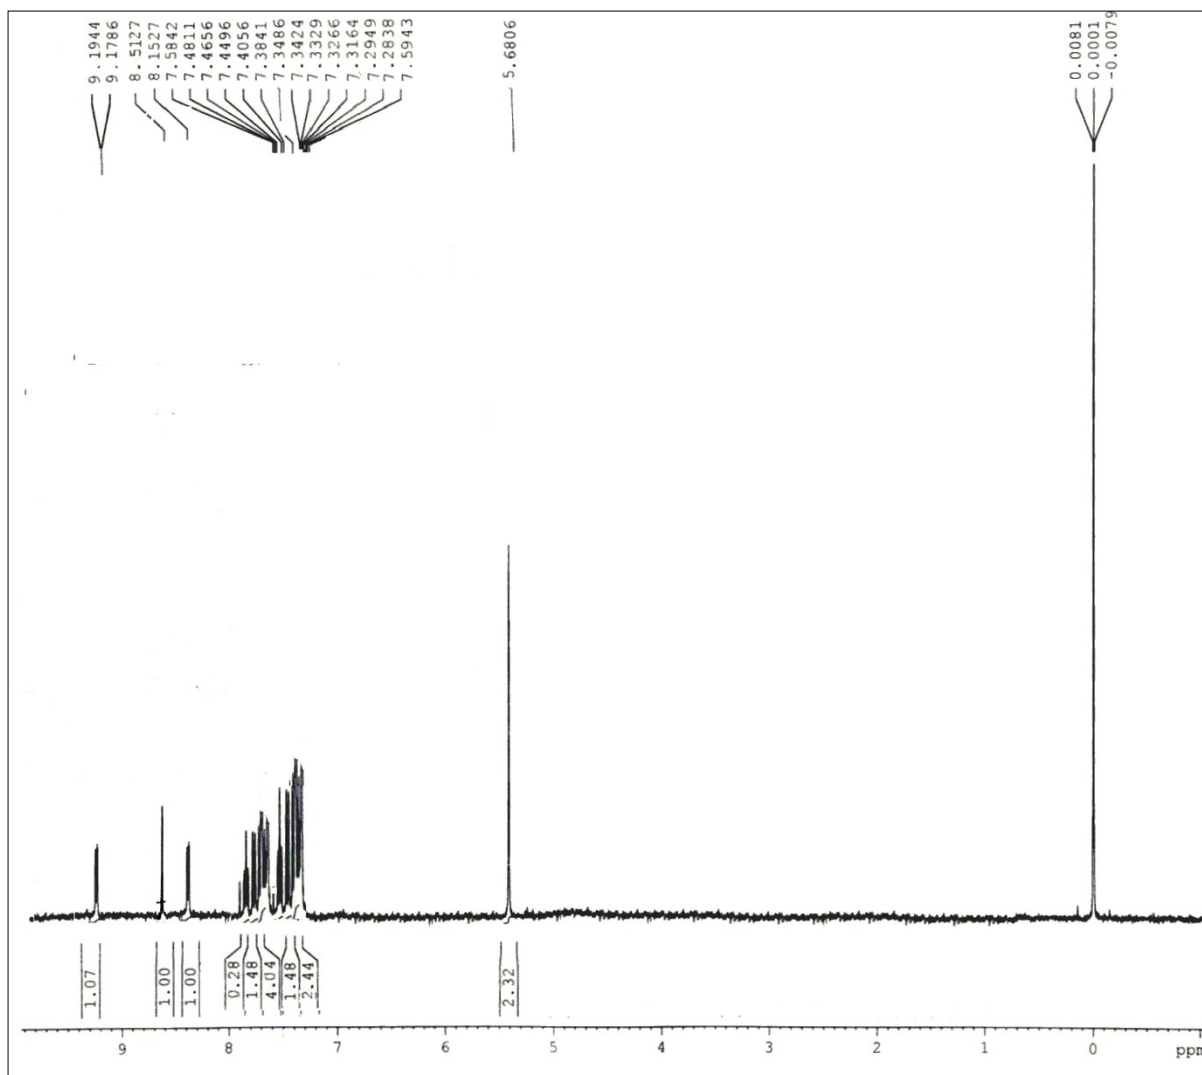

Fig:33. NMR spectra of compound 5b3



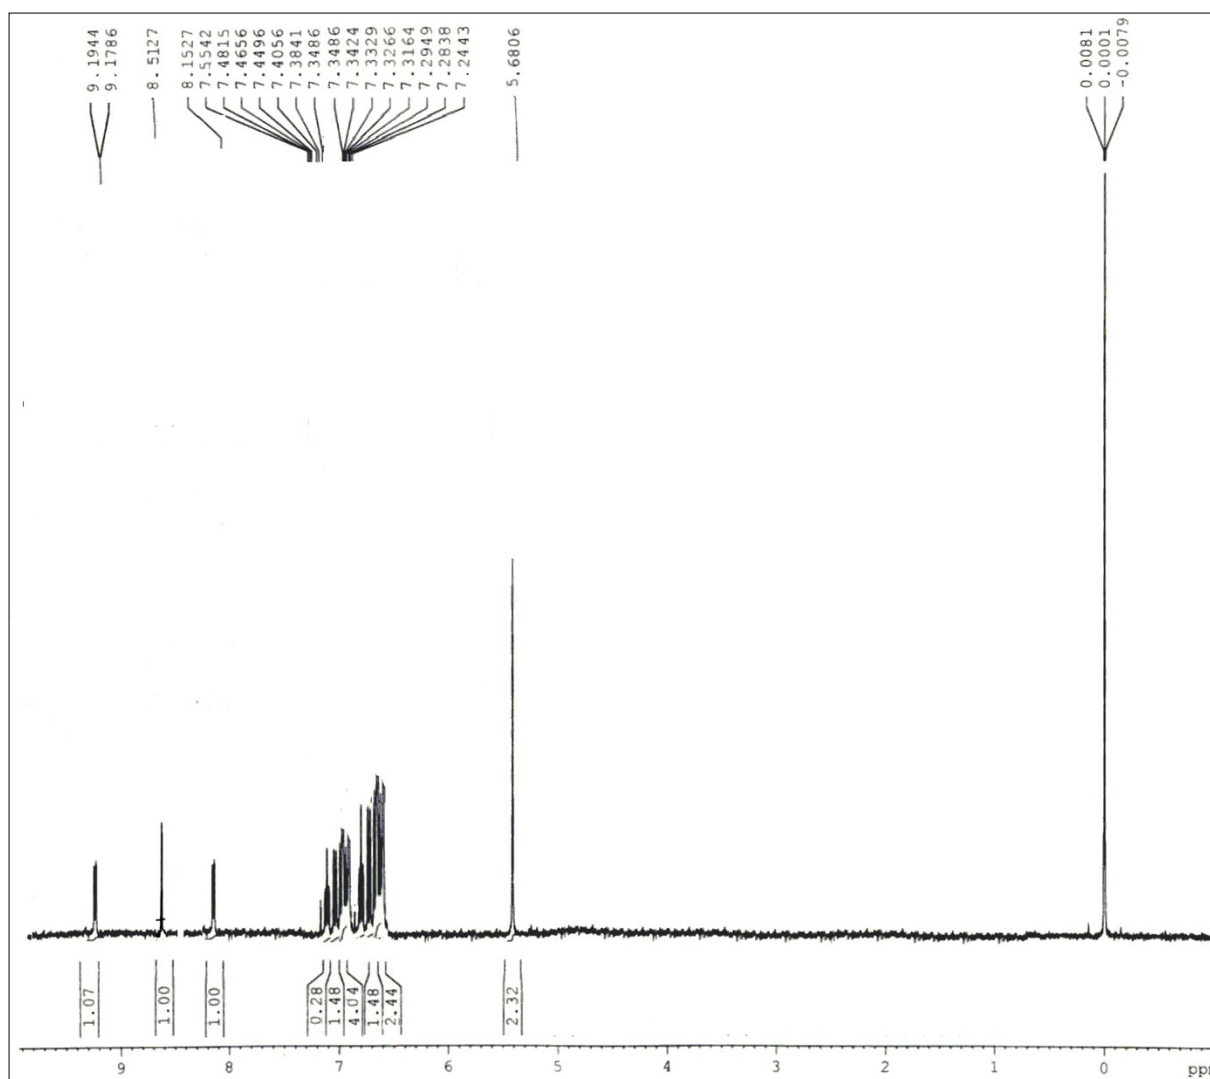

Fig:34. NMR spectra of compound 5b4

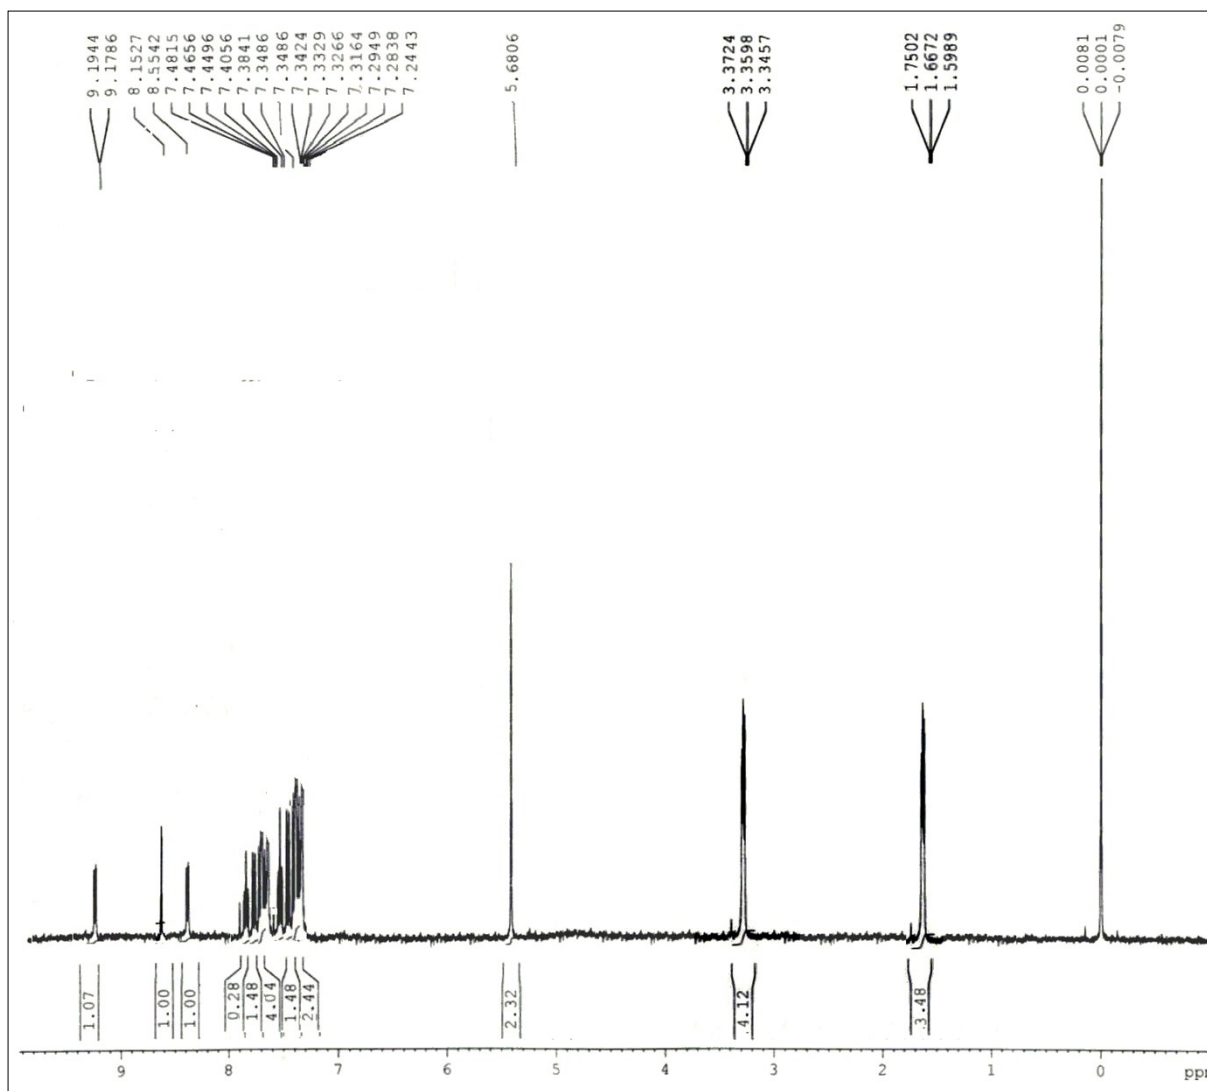

Fig:35. NMR spectra of compound 5b5

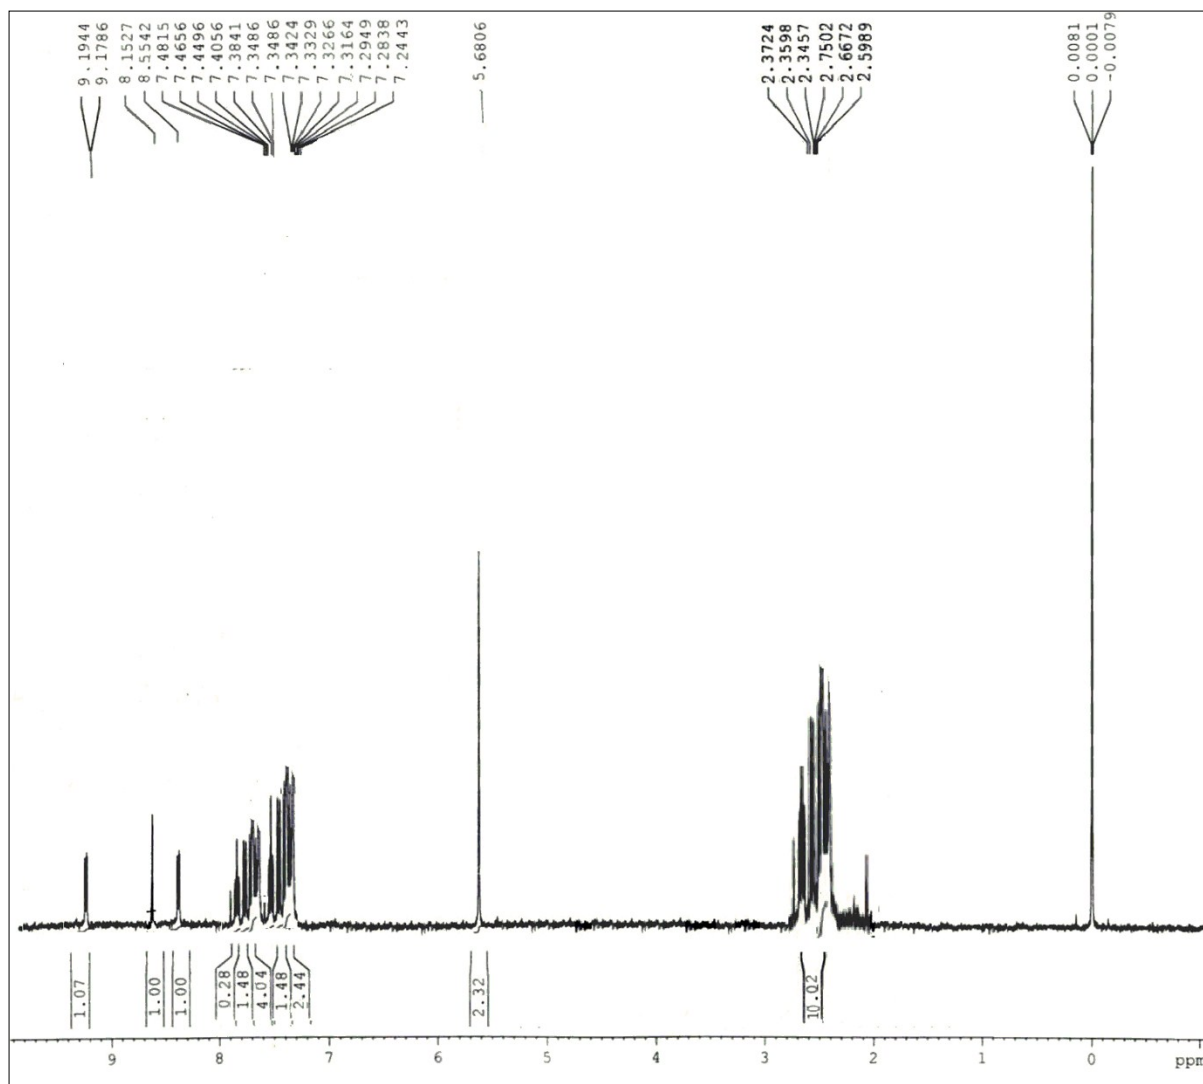

Fig:36. NMR spectra of compound 5b6

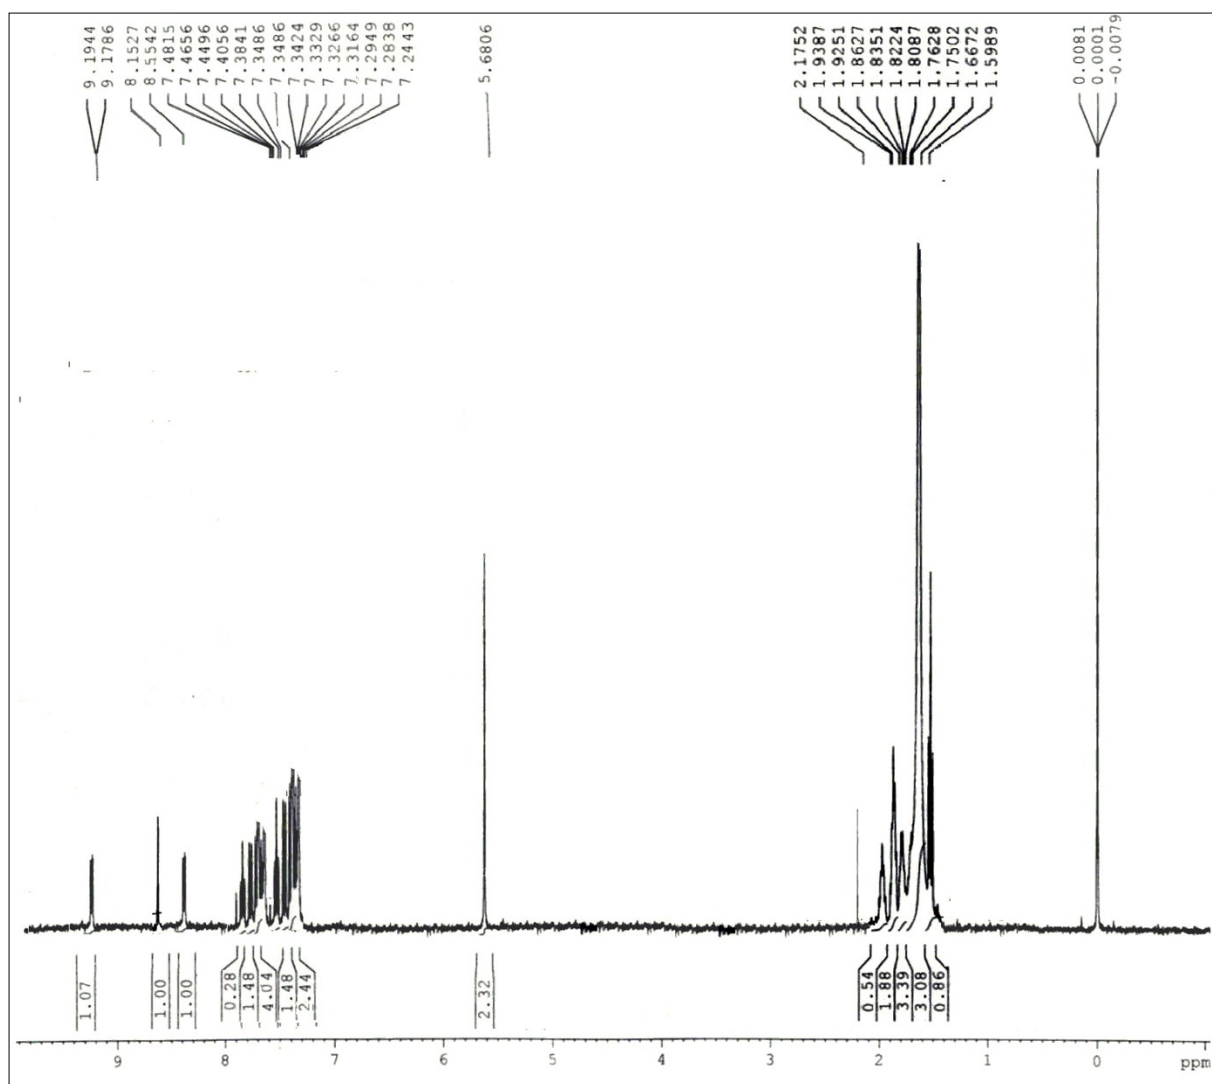

Fig:37. NMR spectra of compound 5b7

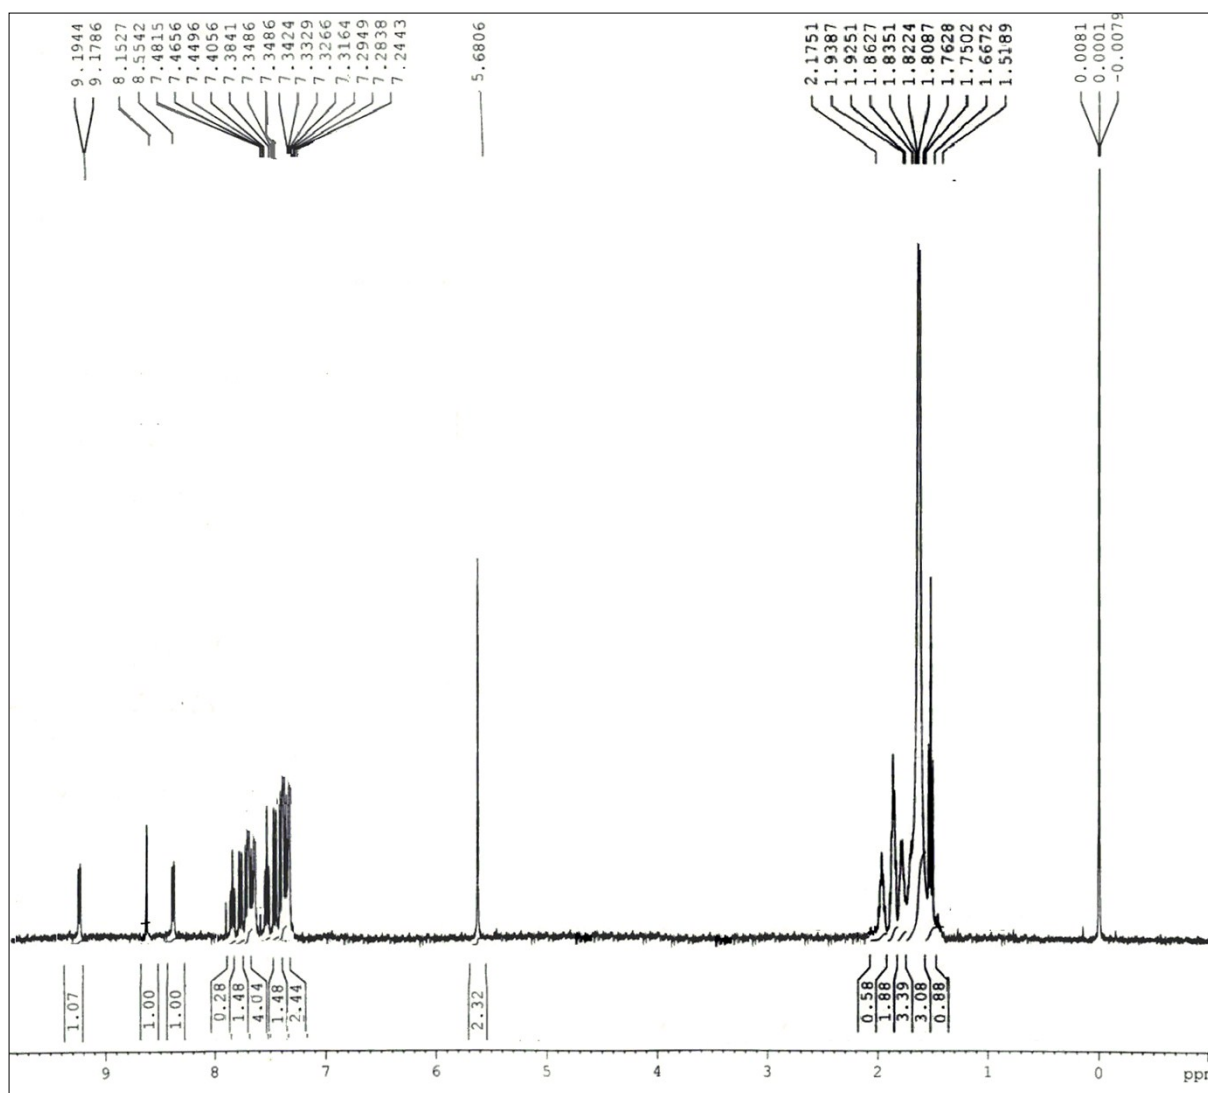

Fig:38. NMR spectra of compound 5b8

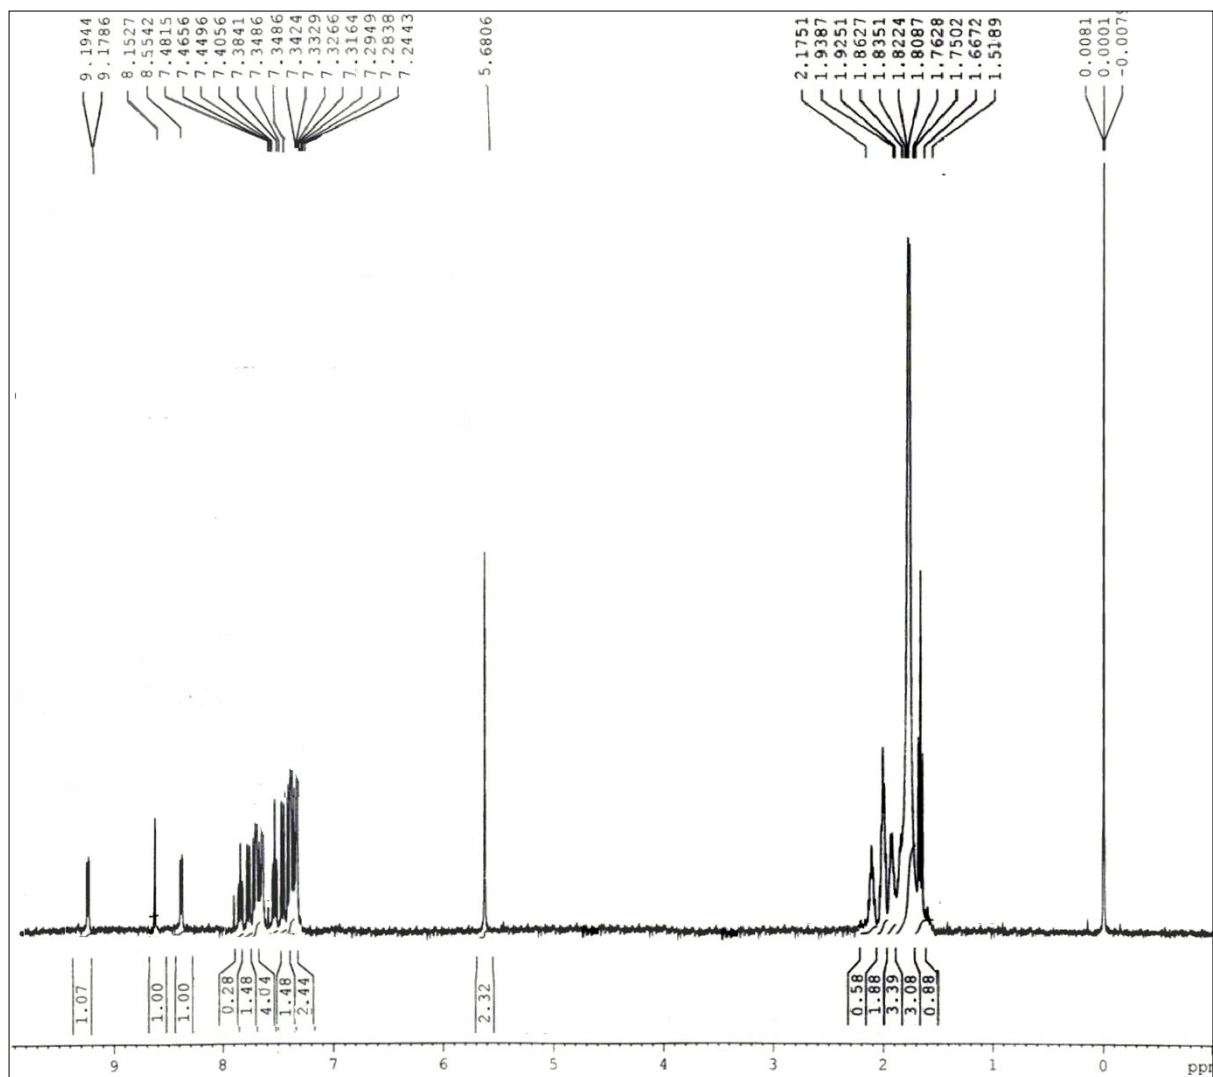

Fig:39. NMR spectra of compound 5b9

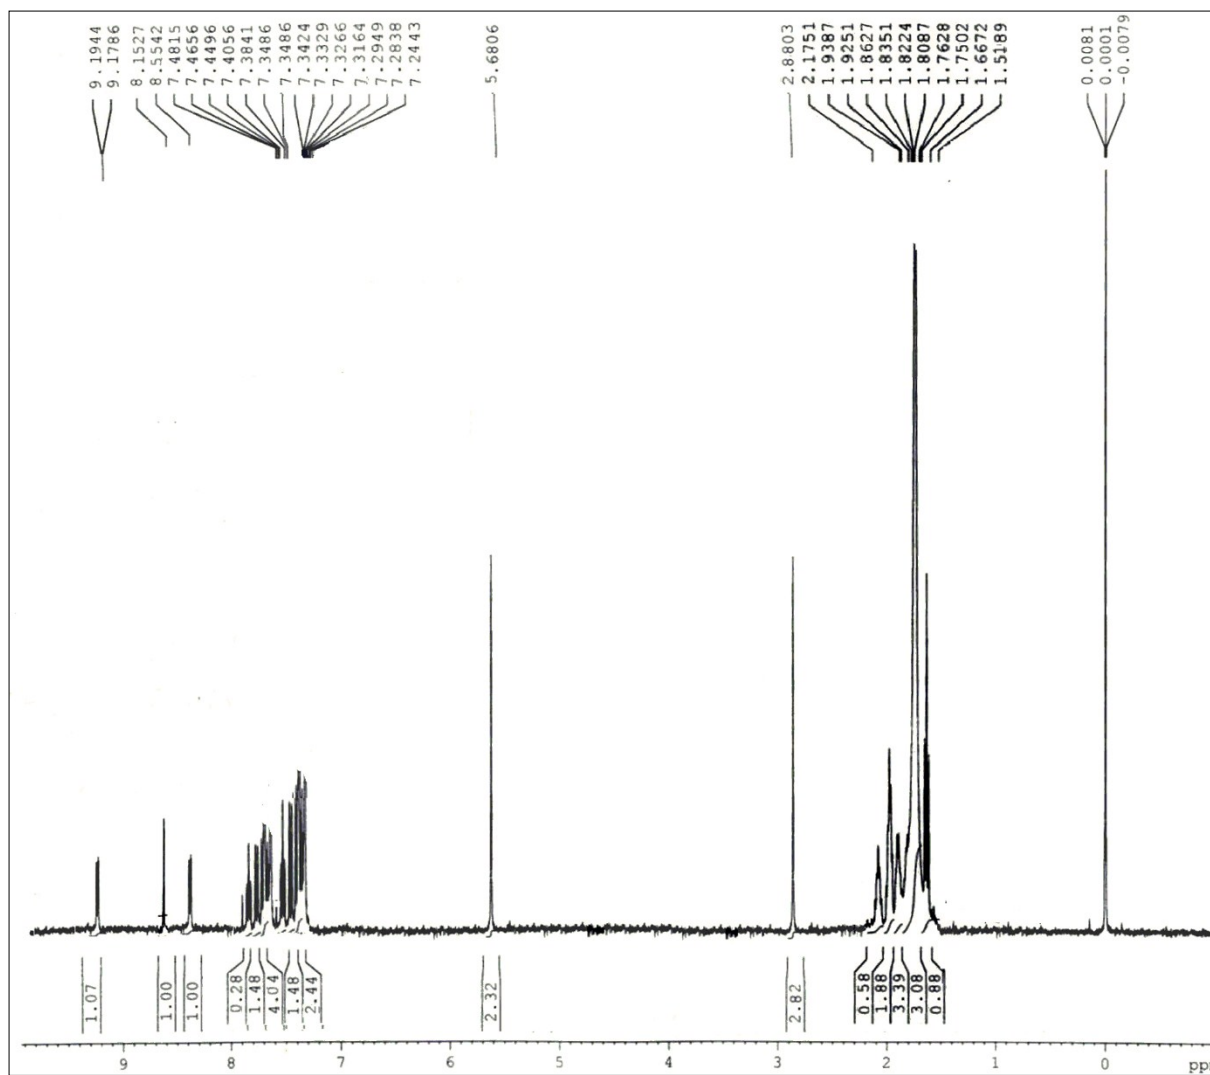

Fig:40. NMR spectra of compound 5b10
